# Supplementary material for: Imidazolium-based ionic liquid-catalyzed hydrosilylation of imines and reductive amination of aldehydes using hydrosilane as the reductant
Source: Royal Society of Chemistry journal article supplement (doi:10.1039/c7ra04245k), 2017-01-01

**Electronic Supporting Information**

**Imidazolium-Based Ionic Liquids Catalyzed Hydrosilylation of  
Imines and Reductive Amination of Aldehydes Using Hydrosilane  
as the Reductant**

Bin Li<sup>a\*</sup>, Shilin Zhang<sup>a</sup>, Weizhen Wu<sup>a</sup>, Lecheng Liang<sup>ab</sup>, Shaohua Jiang<sup>a</sup>, Lu Chen<sup>a\*</sup>  
and Yibiao Li<sup>a</sup>

<sup>a</sup>*School of Chemical & Environmental Engineering, Wuyi University, Jiangmen 529020, Guangdong  
Province, P.R. China*

<sup>b</sup>*Guangdong Wamo New Material Technology Co., Ltd, Jiangmen 529020, Guangdong Province,  
P.R. China*

**Table of Contents**

|    |                                                         |
|----|---------------------------------------------------------|
| S2 | <i>General remarks</i>                                  |
| S2 | <i>General procedures for hydrosilylation reactions</i> |
| S3 | <i>Characterization data of substrates</i>              |
| S9 | <i><sup>1</sup>H and <sup>13</sup>C NMR Spectra</i>     |

### **General remarks**

All reagents were obtained from commercial sources and used as received. Ethanol (anhydrous) were used as received. Technical grade petroleum ether (40-60°C bp.) and ethyl acetate were used for chromatography column.

<sup>1</sup>H NMR spectra were recorded in CDCl<sub>3</sub> at ambient temperature on Bruker AVANCE I 300 spectrometers at 300.1 MHz, using the solvent as internal standard (7.26 ppm). <sup>13</sup>C NMR spectra were obtained at 75 MHz and referenced to the internal solvent signals (central peak is 77.2 ppm). Chemical shift (δ) and coupling constants (*J*) are given in ppm and in Hz, respectively. The peak patterns are indicated as follows: s, singlet; d, doublet; t, triplet; q, quartet; m, multiplet, and br. for broad.

GC analyses were performed with GC-2010 (Shimadzu) equipped with a 30-m capillary column (Supelco, SPBTM-20, fused silica capillary column, 30 M\*0.25 mm\*0.25 mm film thickness), was used with N<sub>2</sub>/air as vector gas. The following GC conditions were used: initial temperature 80 °C, for 2 minutes, then rate 10 °C/min. until 260 °C and 260°C for 10 minutes.

### **Method A: General procedure for [BMIm][FeCl<sub>4</sub>] catalyzed hydrosilylation of imines**

[BMIm][FeCl<sub>4</sub>] (0.1 mmol, 33.6 mg), imine (0.5 mmol), Ph<sub>2</sub>SiH<sub>2</sub> (0.75 mmol, 139 μL), and ethanol (2 mL) were introduced in Schlenk tube under air, equipped with magnetic stirring bar and was stirred at 80 °C. After 16 h, the conversion of the reaction was analyzed by gas chromatography. The solvent was then evaporated under vacuum and the desired product was purified by using a silica gel chromatography column and a mixture of petrol ether/ethyl acetate as eluent.

### **Method B: General procedure for [BMIm][FeCl<sub>4</sub>] catalyzed reductive amination of aldehydes and anilines**

[BMIm][FeCl<sub>4</sub>] (0.1 mmol, 33.6 mg), aldehydes (0.6 mmol), aniline (0.5 mmol), Ph<sub>2</sub>SiH<sub>2</sub> (0.75 mmol, 139 μL), 4 Å molecular sieves (200 mg) and ethanol (2 mL) were introduced in Schlenk tube under air, equipped with magnetic stirring bar and was stirred at 80 °C. After 16 h, the conversion of the reaction was analyzed by gas chromatography. The solvent was then evaporated under vacuum and the desired product was purified by using a silica gel chromatography column and a mixture of petrol ether/ethyl acetate as eluent.

## Characterization data of substrates

---

### 4-Methyl-N-(benzyl)aniline<sup>1</sup> (4a)

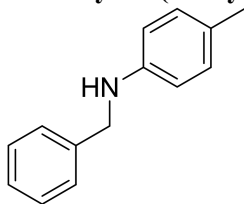

Light yellow oil, Method A: yield = 85%, 84 mg; Method B: yield = 80%, 79 mg.

<sup>1</sup>H NMR (300 MHz, CDCl<sub>3</sub>):  $\delta$  = 7.33-7.45 (m, 5H), 7.04-7.07 (m, 2H), 6.62-6.65 (m, 2H), 4.37 (s, 2H), 3.96 (brs, 1H), 2.31 (s, 3H).

<sup>13</sup>C NMR (75 MHz, CDCl<sub>3</sub>):  $\delta$  = 146.1, 139.8, 129.9, 128.7, 127.6, 127.3, 126.9, 113.1, 48.8, 20.6.

### N-(4-Methoxybenzyl)-4-methylaniline<sup>1</sup> (4b)

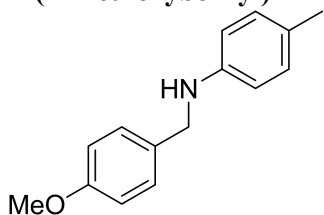

Light yellow powder, Melting Point: 79 - 81 °C, Method A: yield = 84%, 89 mg.

<sup>1</sup>H NMR (300 MHz, CDCl<sub>3</sub>):  $\delta$  = 7.35 (d, 2H,  $J$  = 8.4 Hz), 7.06 (d, 2H,  $J$  = 8.1 Hz), 6.94 (d, 2H,  $J$  = 8.1 Hz), 6.63 (d, 2H,  $J$  = 8.1 Hz), 4.29 (s, 2H), 3.86 (s+brs, 4H), 2.31 (s, 3H).

<sup>13</sup>C NMR (75 MHz, CDCl<sub>3</sub>):  $\delta$  = 158.9, 146.1, 131.7, 129.8, 128.8, 126.7, 114.0, 113.1, 55.3, 48.2, 20.5.

### N-(3-Methyl)-4-methylaniline<sup>2</sup> (4c)

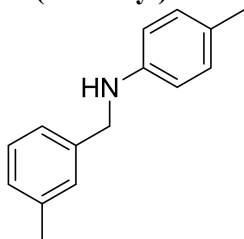

Light yellow oil, Method A: yield = 88%, 93 mg; Method B: yield = 85%, 90 mg.

<sup>1</sup>H NMR (300 MHz, CDCl<sub>3</sub>):  $\delta$  = 7.17-7.33 (m, 4H), 7.08 (d, 2H,  $J$  = 7.8 Hz), 6.67 (d, 2H,  $J$  = 7.8 Hz), 4.35 (s, 2H), 3.97 (brs, 1H), 2.45 (s, 3H), 2.34 (s, 3H).

<sup>13</sup>C NMR (75 MHz, CDCl<sub>3</sub>):  $\delta$  = 148.1, 139.7, 138.4, 129.9, 128.7, 128.5, 128.1, 127.0, 124.8, 113.3, 48.9, 21.6, 20.6.

### 4-Methyl-N-(4-nitrobenzyl)aniline<sup>1</sup> (4d)

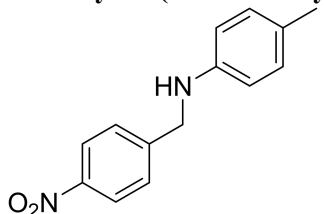

Red oil, Method A: yield = 36%, 44 mg; Method B: yield = 48%, 58 mg.

<sup>1</sup>H NMR (300 MHz, CDCl<sub>3</sub>):  $\delta$  = 8.20 (d, 2H,  $J$  = 9.0 Hz), 7.55 (d, 2H,  $J$  = 9.0 Hz), 7.02 (d, 2H,  $J$  = 7.8 Hz), 6.54 (d, 2H,  $J$  = 8.4 Hz), 4.48 (s, 2H), 4.18 (brs, 1H), 2.27 (s, 3H).

$^{13}\text{C}$  NMR (75 MHz,  $\text{CDCl}_3$ ):  $\delta$  = 148.0, 147.2, 145.2, 130.0, 127.8, 127.5, 123.9, 113.2, 48.0, 20.5.

***N*-(4-Cyanobenzyl)-4-methylaniline<sup>1</sup> (4e)**

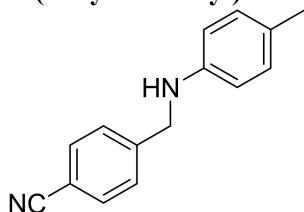

Orange powder, Melting Point: 88 - 90 °C, Method A: yield = 52%, 58 mg; Method B: yield = 55%, 61 mg.

$^1\text{H}$  NMR (300 MHz,  $\text{CDCl}_3$ ):  $\delta$  = 7.60-7.64 (m, 2H), 7.49 (d, 2H,  $J$  = 7.8 Hz), 7.00-7.02 (m, 2H), 6.50-6.54 (m, 2H), 4.42 (s, 2H), 4.12 (brs, 1H), 2.26 (s, 3H).

$^{13}\text{C}$  NMR (75 MHz,  $\text{CDCl}_3$ ):  $\delta$  = 145.7, 145.2, 132.4, 129.9, 127.7, 127.3, 118.9, 113.0, 110.8, 48.1, 20.4.

***N*-Benzylaniline<sup>3</sup> (4f)**

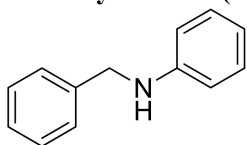

Light yellow oil, Method A: yield = 94%, 86 mg;

$^1\text{H}$  NMR (300 MHz,  $\text{CDCl}_3$ ):  $\delta$  = 7.44-7.32 (m, 5H), 7.25-7.20 (m, 2H), 6.79-6.74 (m, 1H), 6.70-6.67 (m, 2H), 4.38 (s, 2H), 4.11 (brs, 1H).

$^{13}\text{C}$  NMR (75 MHz,  $\text{CDCl}_3$ ):  $\delta$  = 148.3, 139.6, 129.4, 128.8, 127.7, 127.4, 117.8, 113.0, 48.5.

***N*-(4-bromobenzyl)aniline<sup>4</sup> (4g)**

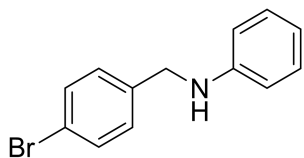

Light yellow oil, Method A: yield = 70%, 91 mg.

$^1\text{H}$  NMR (300 MHz,  $\text{CDCl}_3$ ):  $\delta$  = 7.43-7.30 (m, 7H), 6.57-6.54 (m, 2H), 4.34 (s, 2H), 4.04 (brs, 1H).

$^{13}\text{C}$  NMR (75 MHz,  $\text{CDCl}_3$ ):  $\delta$  = 147.1, 139.0, 132.0, 128.8, 127.5, 127.4, 114.6, 109.2, 48.3.

***N*-[4-(Methoxycarbonyl)benzyl]aniline<sup>2</sup> (4h)**

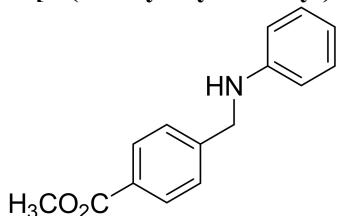

White powder, Melting Point: 46 - 48 °C, Method A: yield = 75%, 90 mg.

$^1\text{H}$  NMR (300 MHz,  $\text{CDCl}_3$ ):  $\delta$  = 8.03 (d, 2H,  $J$  = 7.8 Hz), 7.47 (d, 2H,  $J$  = 7.8 Hz), 7.20-7.18 (m, 2H), 6.77 (t, 1H,  $J$  = 7.5 Hz), 6.65 (d, 2H,  $J$  = 7.8 Hz), 4.44 (s, 2H), 4.34 (brs, 1H), 3.94 (s, 3H).

$^{13}\text{C}$  NMR (75 MHz,  $\text{CDCl}_3$ ):  $\delta$  = 166.9, 147.8, 145.1, 129.8, 129.2, 128.9, 127.0, 117.6, 112.8, 51.9, 47.7.

#### 4-Methoxy-*N*-benzylaniline<sup>1</sup> (4i)

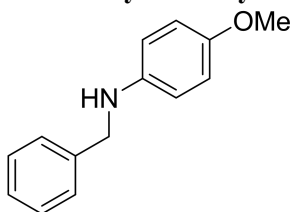

Light yellow cuboids, Melting Point: 47 - 49 °C, Method A: yield = 86%, 92 mg.

Method B: yield = 78%, 86 mg. <sup>1</sup>H NMR (300 MHz, CDCl<sub>3</sub>): δ = 7.46-7.32 (m, 5H), 6.84-6.80 (m, 2H), 6.67-6.64 (m, 2H), 4.33 (s, 3H), 3.78 (s+brs, 3H).

<sup>13</sup>C NMR (75 MHz, CDCl<sub>3</sub>): δ = 152.2, 142.5, 139.7, 128.6, 127.6, 127.2, 114.9, 114.1, 55.8, 49.3.

#### 4-methoxy-*N*-(4-methylbenzyl)aniline<sup>5</sup> (4j)

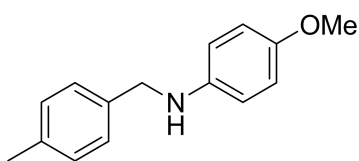

Light yellow oil, Method A: yield = 90%, 102 mg.

<sup>1</sup>H NMR (300 MHz, CDCl<sub>3</sub>): δ = 7.31 (d, 2H, *J* = 8.1 Hz), 7.19 (d, 2H, *J* = 7.8 Hz), 6.83 (d, 2H, *J* = 9.0 Hz), 6.65 (d, 1H, *J* = 9.0 Hz), 4.28 (s, 2H), 3.78 (s, 3H), 2.39 (s, 3H).

<sup>13</sup>C NMR (75 MHz, CDCl<sub>3</sub>): δ = 152.3, 142.7, 136.8, 134.5, 129.4, 127.7, 115.1, 114.3, 55.9, 49.2, 21.2.

#### 4-Bromo-*N*-(4-methylbenzyl)aniline<sup>6</sup> (4l)

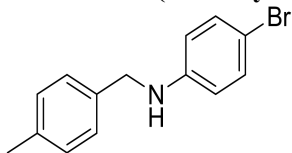

Light yellow oil, Method A: yield = 72%, 99 mg.

<sup>1</sup>H NMR (300 MHz, CDCl<sub>3</sub>): δ = 7.23-7.33 (m, 6H), 6.54-6.57 (m, 2H), 4.31 (s, 2H), 3.98 (brs, 1H), 2.44 (s, 3H).

<sup>13</sup>C NMR (75 MHz, CDCl<sub>3</sub>): δ = 147.2, 137.1, 135.9, 132.0, 129.5, 127.5, 114.5, 109.1, 48.1, 21.2.

#### *N*-benzyl-2-methylaniline<sup>1</sup> (4m)

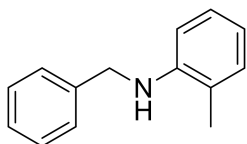

White powder, Melting Point : 58 - 60 °C, Method A: yield = 77%, 76 mg.

<sup>1</sup>H NMR (300 MHz, CDCl<sub>3</sub>): δ = 7.38-7.50 (m, 5H), 7.17-7.21 (m, 2H), 6.71-6.81 (m, 2H), 4.47 (s, 2H), 3.95 (brs, 1H), 2.27 (s, 3H).

<sup>13</sup>C NMR (75 MHz, CDCl<sub>3</sub>): δ = 146.2, 139.6, 130.2, 128.8, 127.6, 127.4, 127.3, 122.0, 117.3, 110.1, 48.4, 17.7.

***N*-(Cyclohexylmethyl)-4-methylaniline<sup>7</sup> (4n)**

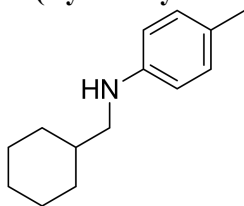

Light yellow oil, Method A: yield = 75%, 76 mg.

<sup>1</sup>H NMR (300 MHz, CDCl<sub>3</sub>): δ = 7.07 (d, 2H, *J* = 7.8 Hz), 6.62 (d, 2H, *J* = 7.8 Hz), 3.63 (brs, 1H), 3.03 (d, 2H, *J* = 6.6 Hz), 2.34 (s, 3H), 1.93-1.65 (m, 5H), 1.40-1.15 (m, 4H), 1.09-1.03 (m, 2H).

<sup>13</sup>C NMR (75 MHz, CDCl<sub>3</sub>): δ = 146.5, 129.9, 126.3, 113.0, 51.2, 37.7, 31.5, 26.7, 26.1, 20.5.

***N*-(4-Methyl)-4-methylaniline<sup>1</sup> (4o)**

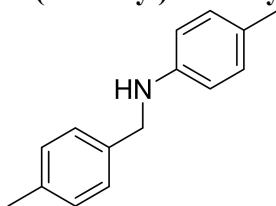

White powder, Melting Point: 54 - 56 °C, Method B: yield = 86%, 91 mg.

<sup>1</sup>H NMR (300 MHz, CDCl<sub>3</sub>): δ = 7.32 (d, 2H, *J* = 7.8 Hz), 7.21 (d, 2H, *J* = 7.8 Hz), 7.05 (d, 2H, *J* = 8.4 Hz), 6.61-6.64 (m, 2H), 4.32 (s, 2H), 3.90 (brs, 1H), 2.40 (s, 3H), 2.30 (s, 3H).

<sup>13</sup>C NMR (75 MHz, CDCl<sub>3</sub>): δ = 146.0, 136.7, 136.6, 129.7, 129.2, 127.5, 126.6, 112.9, 48.4, 21.1, 20.4.

***N*-(4-Bromobenzyl)-4-methylaniline<sup>1</sup> (4p)**

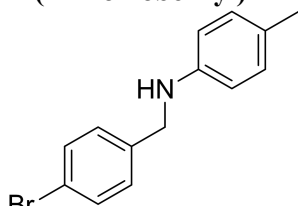

Light yellow powder, Melting Point: 89.5 - 91 °C, Method B: yield = 82%, 113 mg.

<sup>1</sup>H NMR (300 MHz, CDCl<sub>3</sub>): δ = 7.48 (d, 2H, *J* = 8.4 Hz), 7.26 (d, 2H, *J* = 8.4 Hz), 7.01 (d, 2H, *J* = 8.1 Hz), 6.56 (d, 2H, *J* = 8.4 Hz), 4.29 (s, 2H), 3.95 (brs, 1H), 2.27 (s, 3H).

<sup>13</sup>C NMR (75 MHz, CDCl<sub>3</sub>): δ = 145.6, 138.8, 131.7, 129.8, 129.1, 127.0, 120.9, 113.1, 48.0, 20.4.

***N*-Benzyl-4-chloroaniline<sup>8</sup> (4q)**

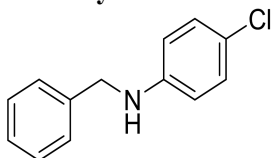

Light yellow oil, Method B: yield = 75%, 81 mg,

<sup>1</sup>H NMR (300 MHz, CDCl<sub>3</sub>): δ = 7.36-7.42 (m, 5H), 7.18 (d, 2H, *J* = 9.0 Hz), 6.60 (d, 2H, *J* = 9.0 Hz), 4.35 (s, 2H), 4.01 (brs, 1H).

<sup>13</sup>C NMR (75 MHz, CDCl<sub>3</sub>): δ = 146.7, 139.0, 129.2, 128.8, 127.5, 127.4, 122.2, 114.1, 48.4.

**2-Fluoro-*N*-benzylaniline<sup>9</sup> (4r)**

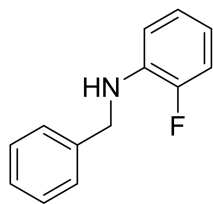

Colorless oil, Method B: yield = 88%, 78 mg.

$^1\text{H NMR}$  (300 MHz,  $\text{CDCl}_3$ ):  $\delta$  = 7.34-7.47 (m, 5H), 7.01-7.09 (m, 2H), 6.60-6.78 (m, 2H), 4.43 (s, 2H), 4.21 (brs, 1H).

$^{13}\text{C NMR}$  (75 MHz,  $\text{CDCl}_3$ ):  $\delta$  = 153.1 (d,  $J_{\text{CF}} = 236.9\text{Hz}$ ), 139.1, 134.5, 128.8, 128.0, 127.5, 124.7 (d,  $J_{\text{CF}} = 3.45\text{Hz}$ ), 116.9 (d,  $J_{\text{CF}} = 6.9\text{Hz}$ ), 114.4 (d,  $J_{\text{CF}} = 18.3\text{Hz}$ ), 112.5 (d,  $J_{\text{CF}} = 3.3\text{Hz}$ ), 48.0.

#### ***N*-neopentylaniline<sup>10</sup> (4s)**

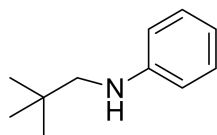

Light yellow oil, Method B: yield = 80%, 65 mg.

$^1\text{H NMR}$  (300 MHz,  $\text{CDCl}_3$ ):  $\delta$  = 7.24-7.20 (m, 2H), 6.67-6.75 (m, 3H), 4.80 (brs, 1H), 2.96 (s, 2H), 1.06 (s, 9H).

$^{13}\text{C NMR}$  (75 MHz,  $\text{CDCl}_3$ ):  $\delta$  = 149.1, 129.2, 117.0, 112.7, 55.9, 31.9, 27.7.

#### **Dibenzylamine<sup>3</sup> (4t)**

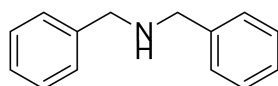

Colorless oil, Method B: yield = 76%, 75 mg.

$^1\text{H NMR}$  (300 MHz,  $\text{CDCl}_3$ ):  $\delta$  = 7.38-7.27 (m, 10H), 3.85 (s, 4H), 1.87 (brs, 1H).

$^{13}\text{C NMR}$  (75 MHz,  $\text{CDCl}_3$ ):  $\delta$  = 140.3, 128.4, 128.2, 127.0, 53.2.

## References

- [1] Li, B.; Sortais, J.-B.; Darcel, C.; Dixneuf, P. H. *ChemSusChem*, **2012**, *5*, 396.
- [2] Cui, X.; Zhang, Y.; Shi, F.; Deng, Y. *Chem. Eur. J.*, **2011**, *17*, 2581.
- [3] Zheng, J.; Roisnel, T.; Darcel, C.; Sortais, J.-B. *ChemCatChem*, **2013**, *5*, 2729.
- [4] Liu, P.; Liang, R.; Lu, L.; Yu, Z.; Li, F. *J. Org. Chem.* **2017**, *82*, 1943.
- [5] Kolesnikov, P. N.; Yagafarov, N. Z.; Usanov, D. L.; Maleev, V. I.; Chusov, D. *Org. Lett.* **2015**, *17*, 173.
- [6] Motoyama, Y.; Taguchi, M.; Desmira, N.; Yoon, S.-H.; Mochida, I.; Nagashima, H. *Chem-Asian J.* **2014**, *9*, 71.
- [7] Zhou, W.; Fan, M.; Yin, J.; Jiang, Y.; Ma, D. *J. Am. Chem. Soc.*, **2015**, *137*, 11942.
- [8] Zhan, L.-W.; Han, L.; Xing, P.; Jiang, B. *Org. Lett.* **2015**, *17*, 5990.
- [9] Zhao, Y.; Foo, S. W.; Saito, S. *Angew. Chem., Int. Ed.*, **2011**, *50*, 3006.
- [10] Sorribes, I.; Junge, K.; Beller, M. *J. Am. Chem. Soc.*, **2014**, *136*, 14314.



### 4-Methyl-N-(benzyl)aniline (4a)

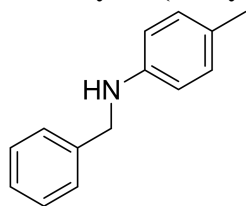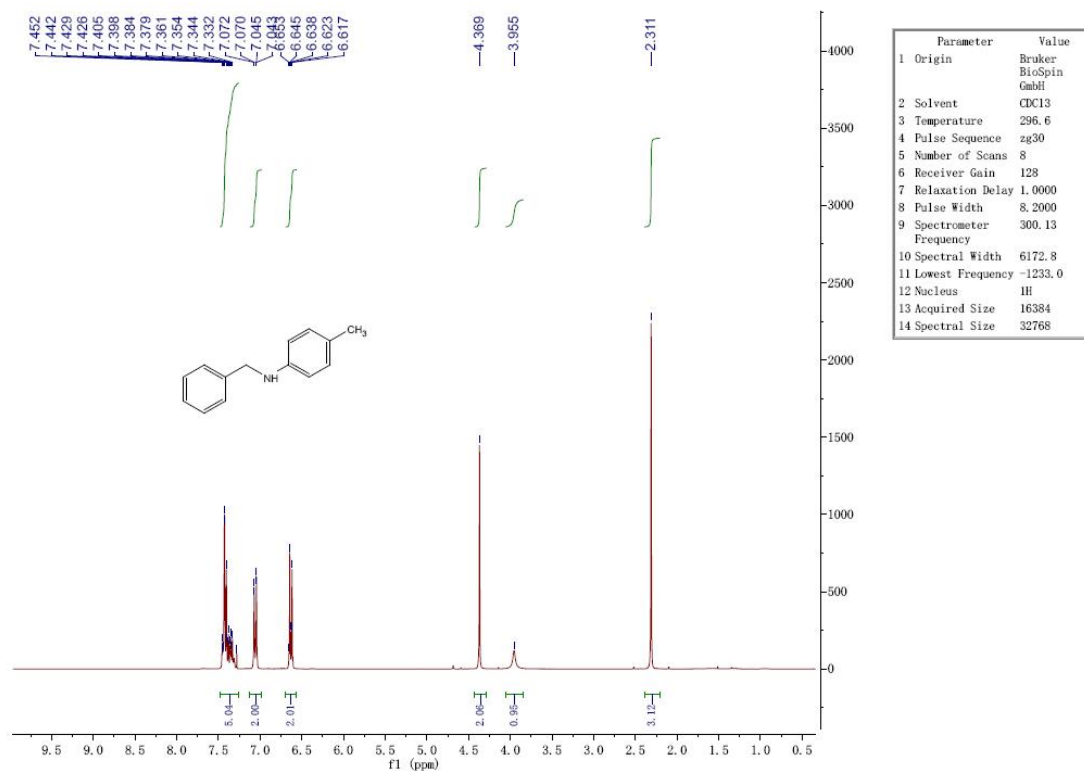

| Parameter           | Value               |
|---------------------|---------------------|
| 1 Origin            | Bruker BioSpin GmbH |
| 2 Solvent           | CDCl3               |
| 3 Temperature       | 296.6               |
| 4 Pulse Sequence    | zg30                |
| 5 Number of Scans   | 8                   |
| 6 Receiver Gain     | 128                 |
| 7 Relaxation Delay  | 1.0000              |
| 8 Pulse Width       | 8.2000              |
| 9 Spectrometer      | 300.13 Frequency    |
| 10 Spectral Width   | 6172.8              |
| 11 Lowest Frequency | -1233.0             |
| 12 Nucleus          | 1H                  |
| 13 Acquired Size    | 16384               |
| 14 Spectral Size    | 32768               |

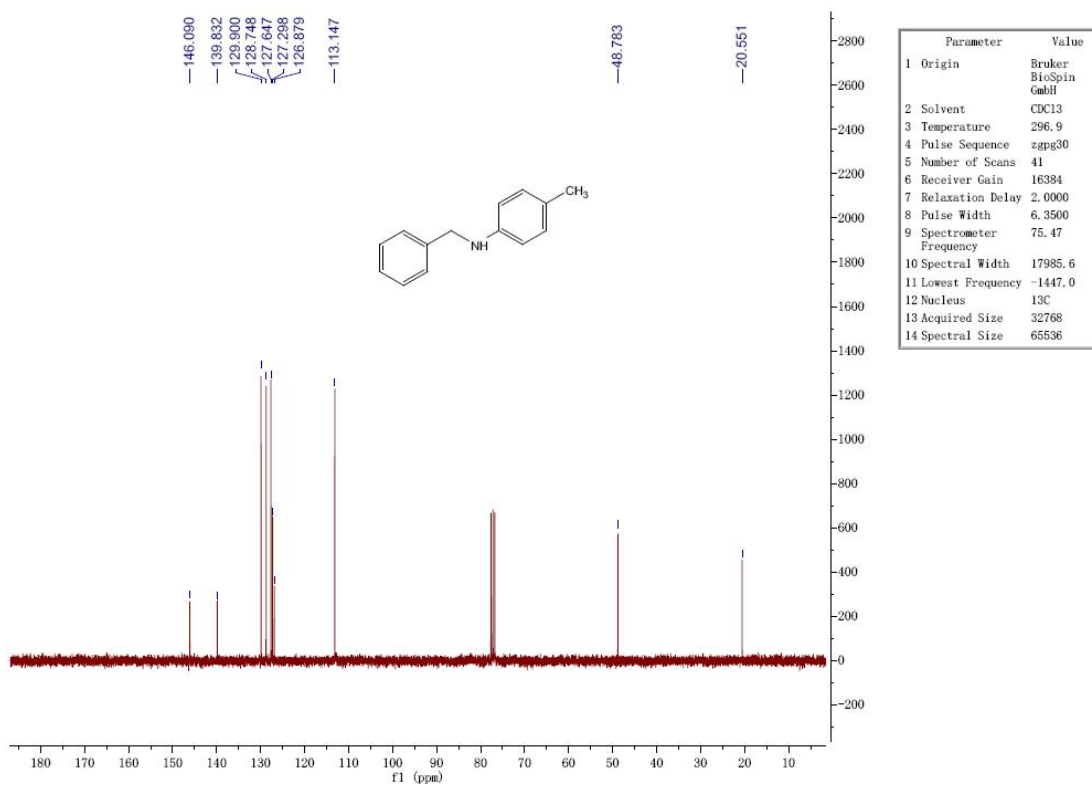

| Parameter           | Value               |
|---------------------|---------------------|
| 1 Origin            | Bruker BioSpin GmbH |
| 2 Solvent           | CDCl3               |
| 3 Temperature       | 296.9               |
| 4 Pulse Sequence    | zgpg30              |
| 5 Number of Scans   | 41                  |
| 6 Receiver Gain     | 16384               |
| 7 Relaxation Delay  | 2.0000              |
| 8 Pulse Width       | 6.3500              |
| 9 Spectrometer      | 75.47 Frequency     |
| 10 Spectral Width   | 17985.6             |
| 11 Lowest Frequency | -1447.0             |
| 12 Nucleus          | 13C                 |
| 13 Acquired Size    | 32768               |
| 14 Spectral Size    | 65536               |

# N-(4-Methoxybenzyl)-4-methylaniline (4b)

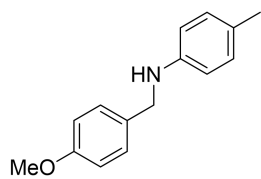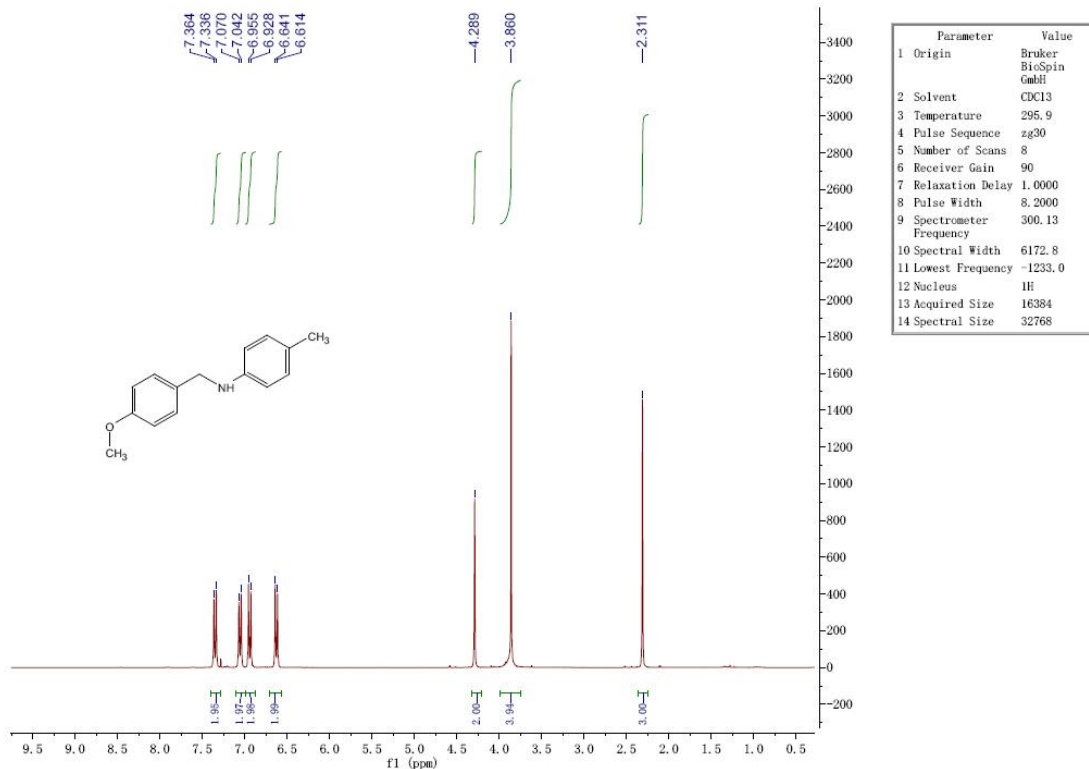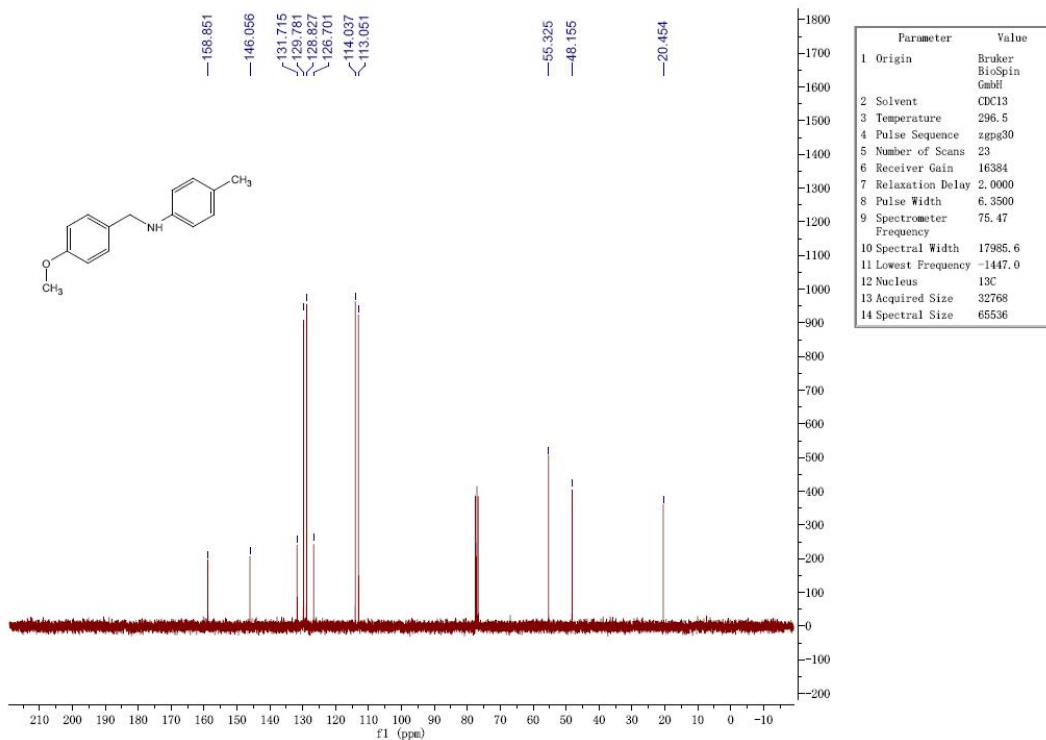

**N-(3-Methyl)-4-methylaniline (4c)**

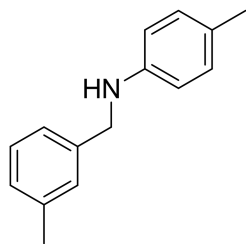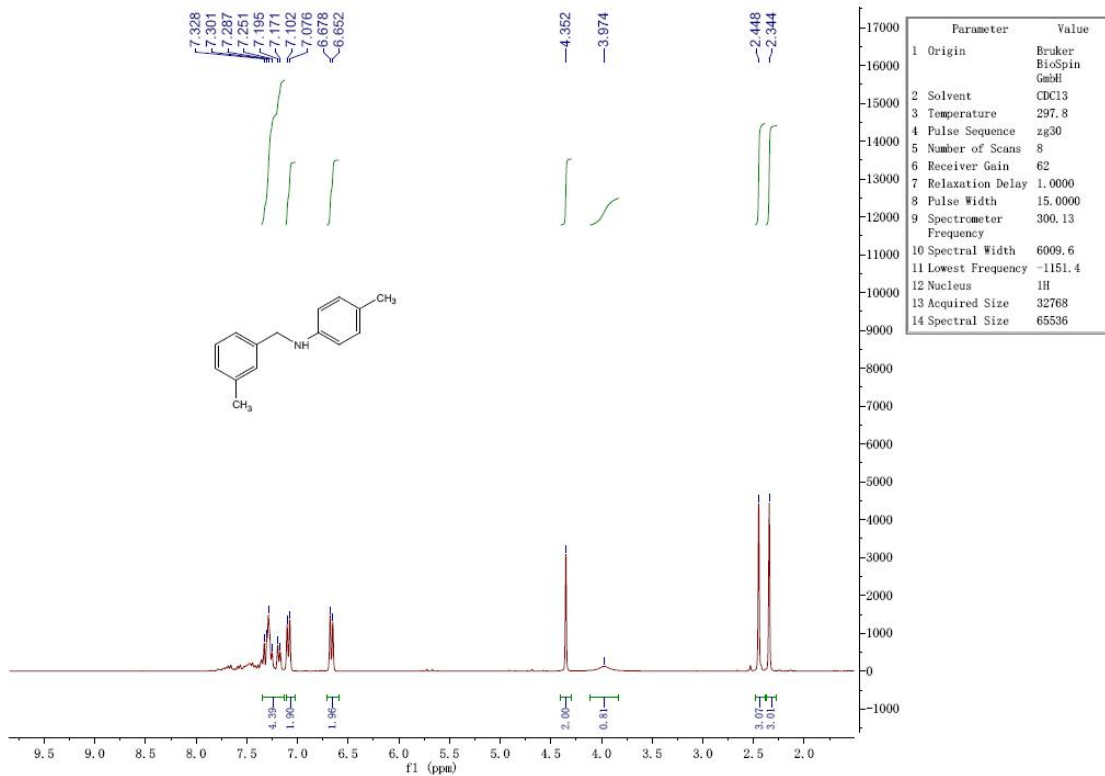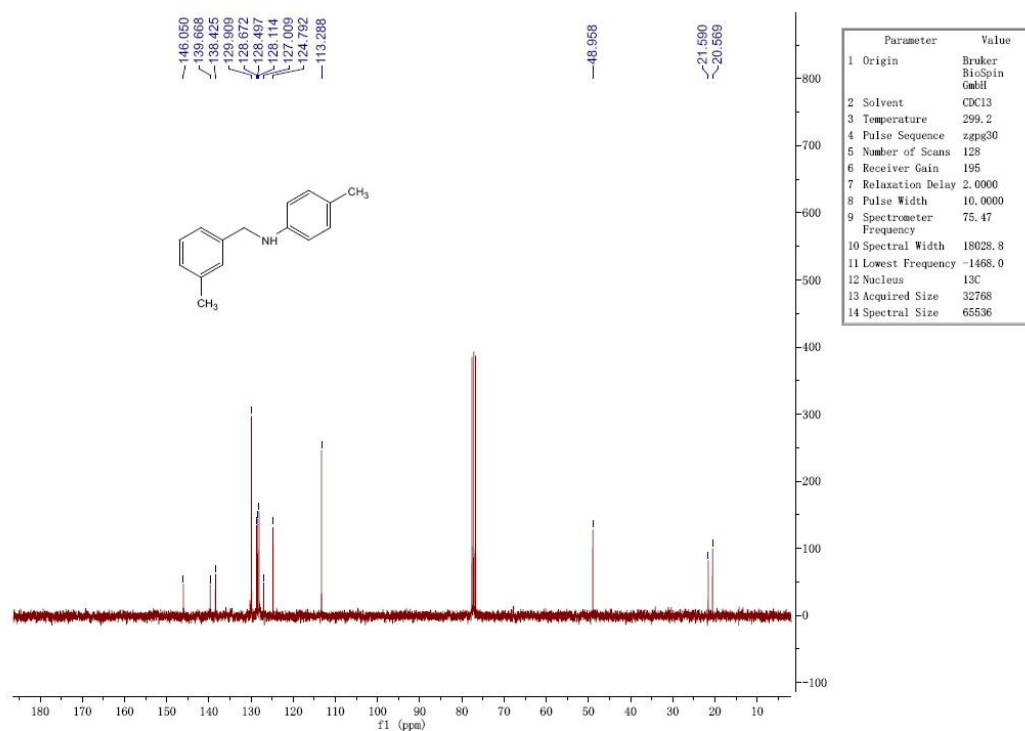

### 4-Methyl-N-(4-nitrobenzyl)aniline (4d)

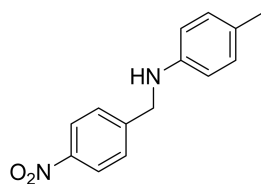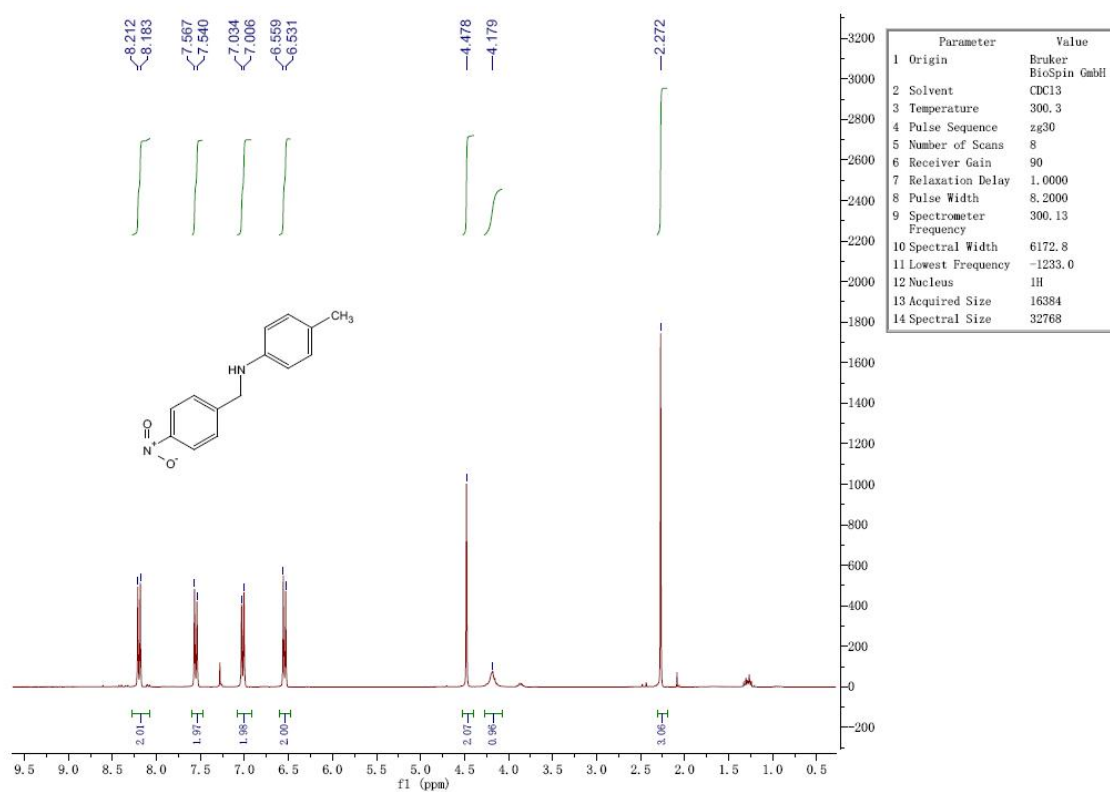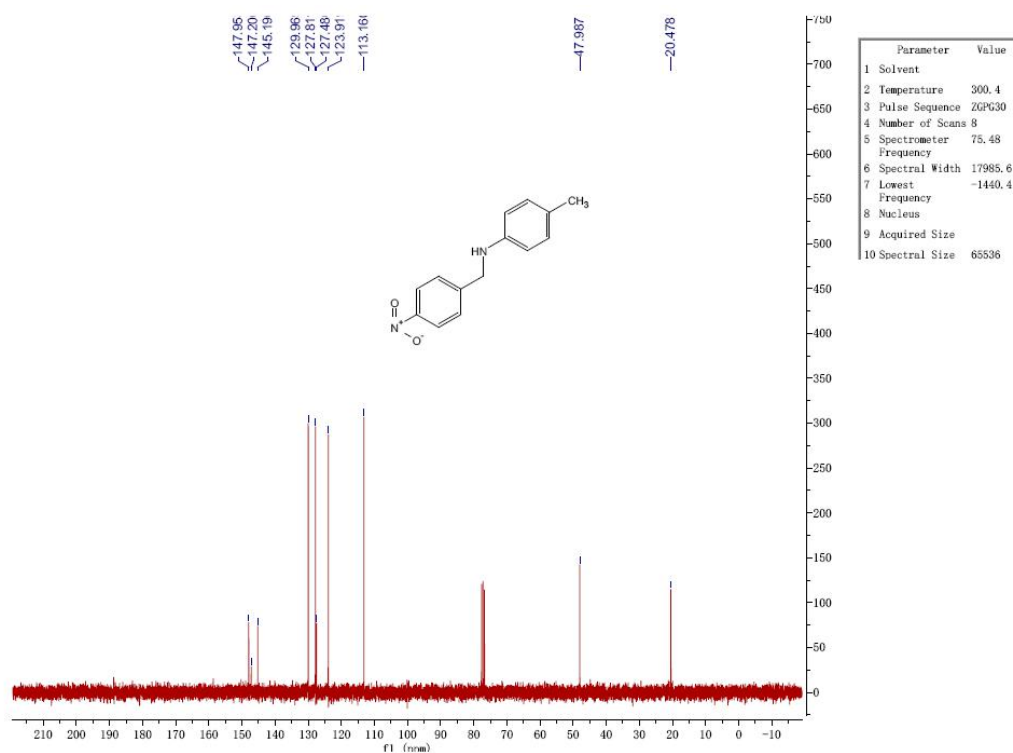

# N-(4-Cyanobenzyl)-4-methylaniline (4e)

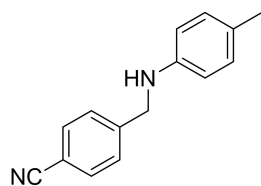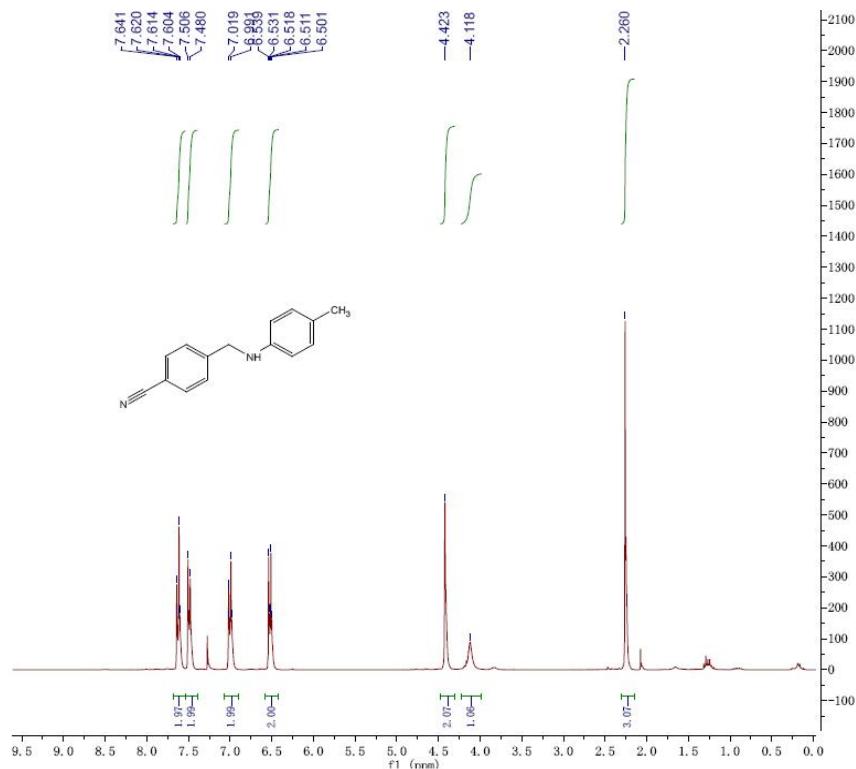

| Parameter           | Value               |
|---------------------|---------------------|
| 1 Origin            | Bruker BioSpin GmbH |
| 2 Solvent           | CDCl3               |
| 3 Temperature       | 295.9               |
| 4 Pulse Sequence    | zg30                |
| 5 Number of Scans   | 8                   |
| 6 Receiver Gain     | 128                 |
| 7 Relaxation Delay  | 1.0000              |
| 8 Pulse Width       | 8.2000              |
| 9 Spectrometer      | 300.13              |
| Frequency           |                     |
| 10 Spectral Width   | 6172.8              |
| 11 Lowest Frequency | -1233.0             |
| 12 Nucleus          | <sup>1</sup> H      |
| 13 Acquired Size    | 16384               |
| 14 Spectral Size    | 32768               |

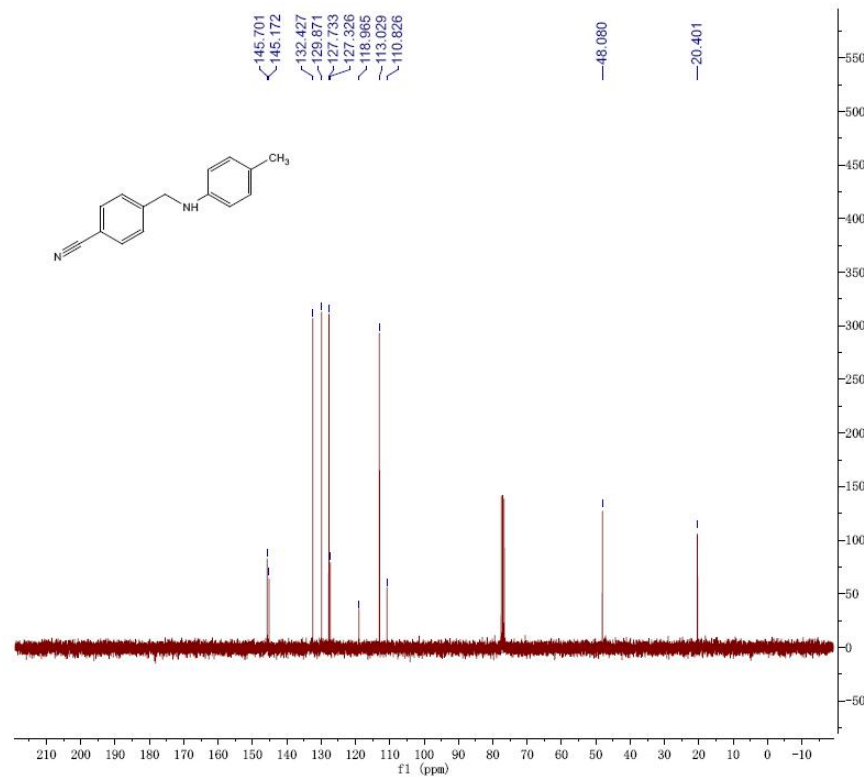

| Parameter           | Value               |
|---------------------|---------------------|
| 1 Origin            | Bruker BioSpin GmbH |
| 2 Solvent           | CDCl3               |
| 3 Temperature       | 295.6               |
| 4 Pulse Sequence    | zgpg30              |
| 5 Number of Scans   | 21                  |
| 6 Receiver Gain     | 5792                |
| 7 Relaxation Delay  | 2.0000              |
| 8 Pulse Width       | 6.3500              |
| 9 Spectrometer      | 75.47               |
| Frequency           |                     |
| 10 Spectral Width   | 17985.6             |
| 11 Lowest Frequency | -1447.0             |
| 12 Nucleus          | <sup>13</sup> C     |
| 13 Acquired Size    | 32768               |
| 14 Spectral Size    | 65536               |

# N-Benzylaniline (4f)

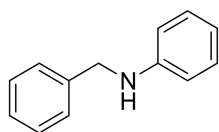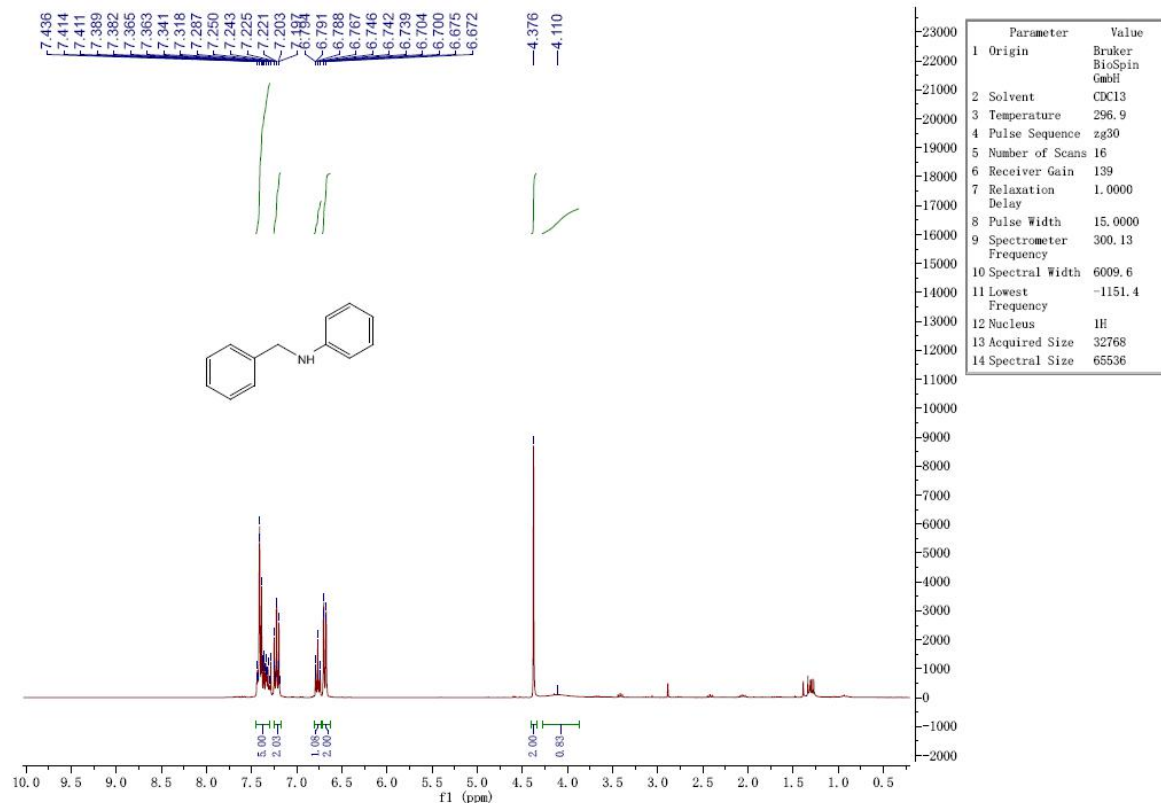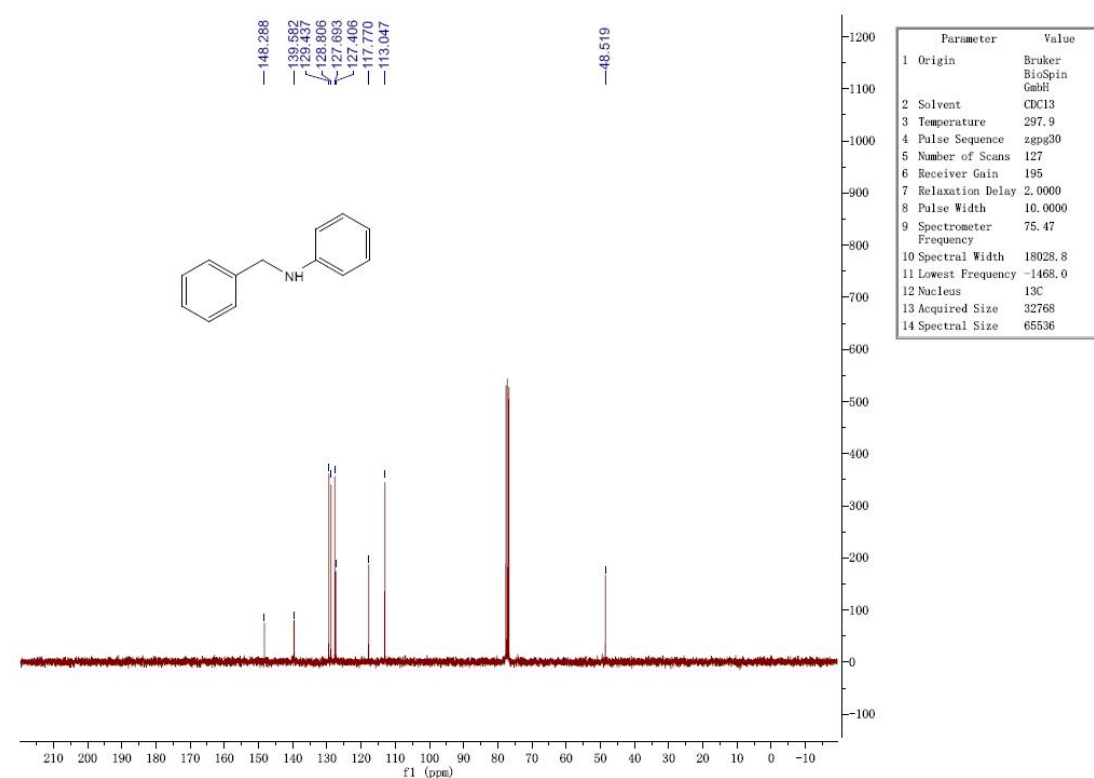

# N-(4-bromobenzyl)aniline (4g)

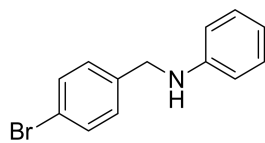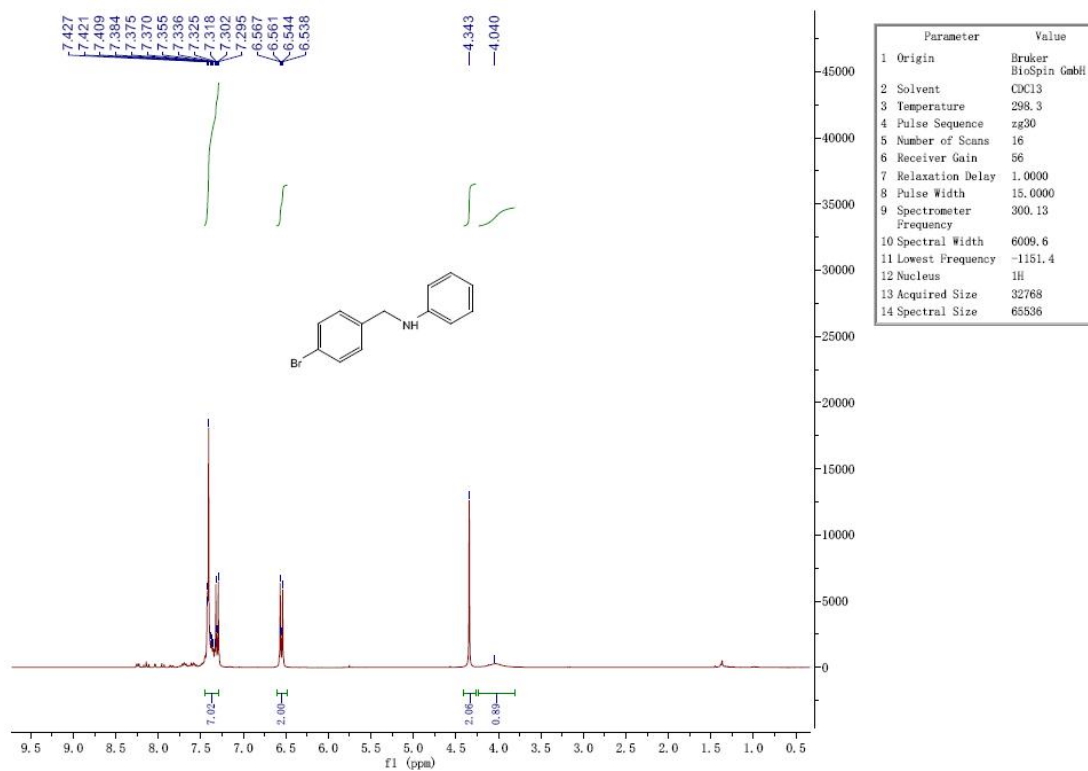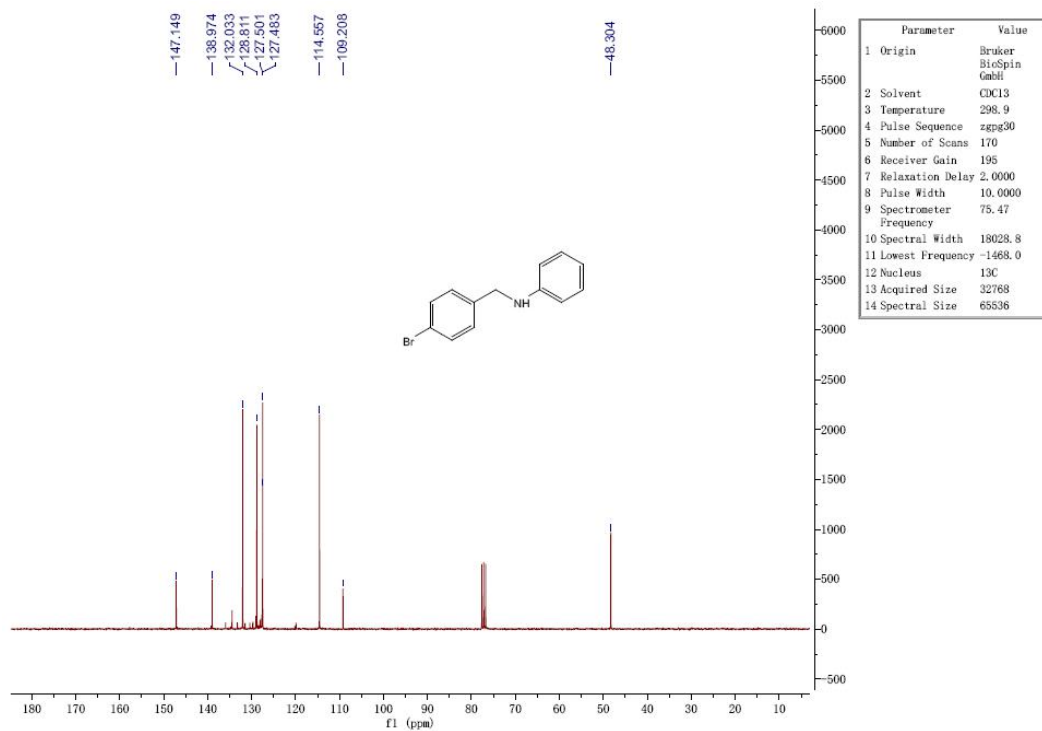

# N-[4-(Methoxycarbonyl)benzyl]aniline (4h)

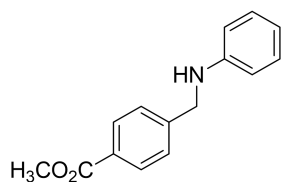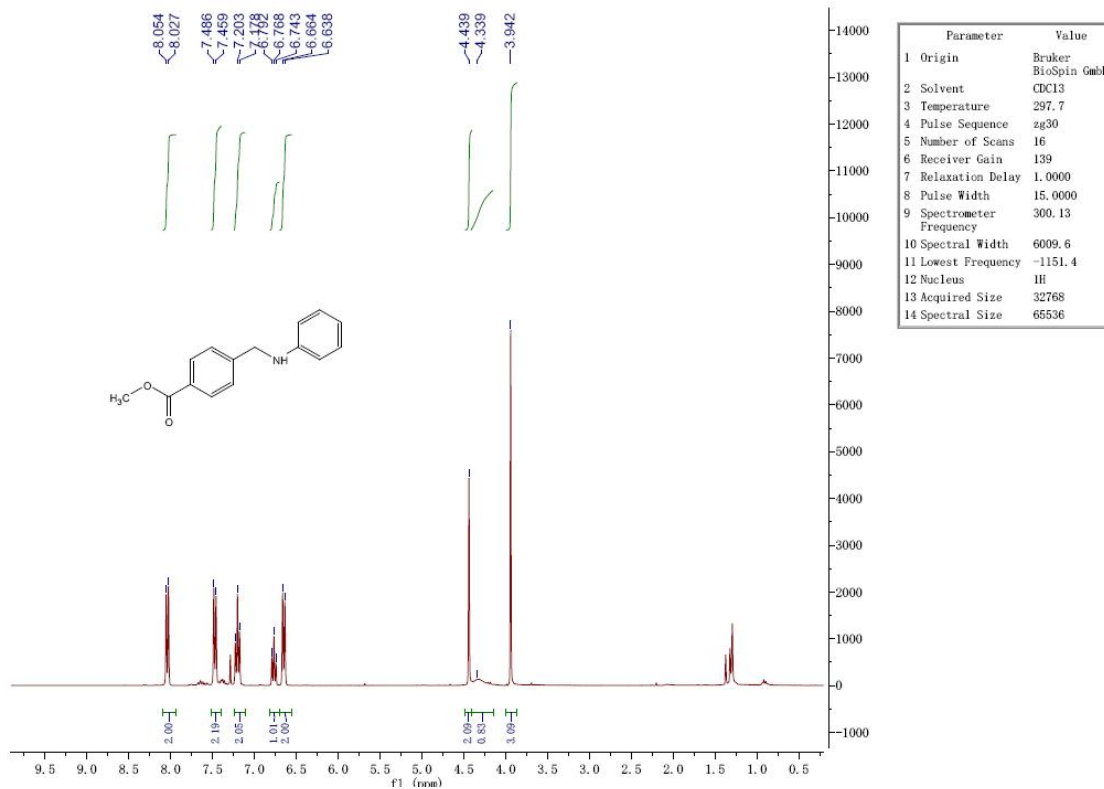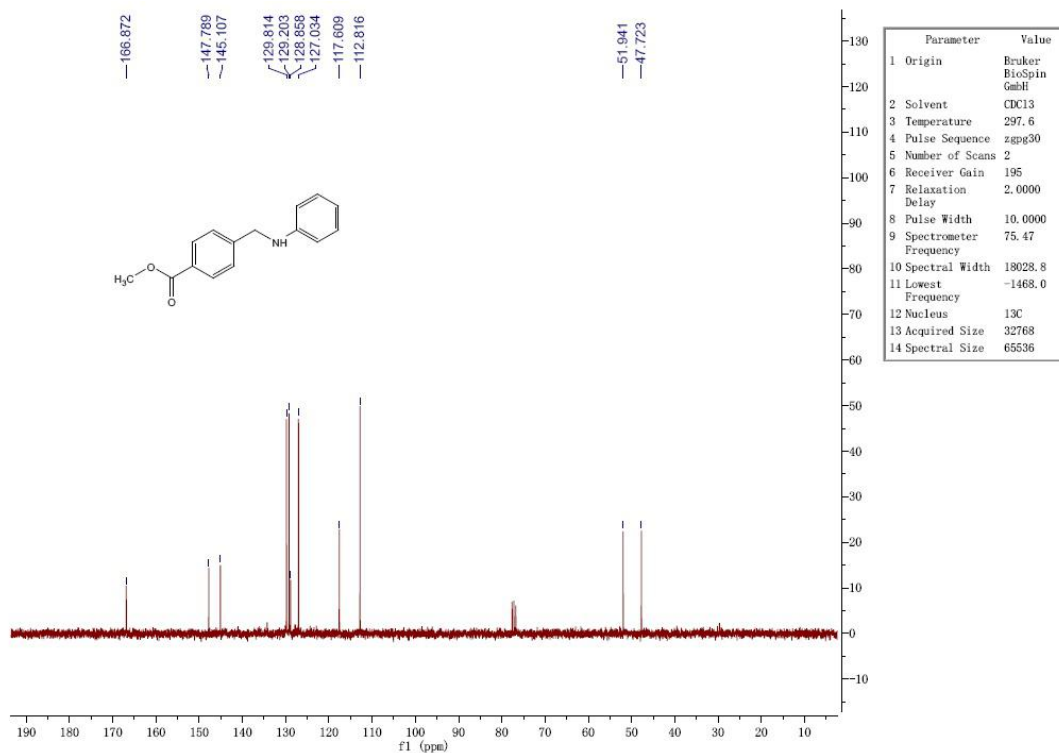



### 4-Methoxy-N-benzylaniline (4i)

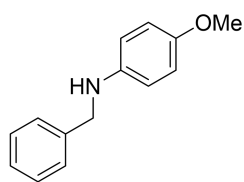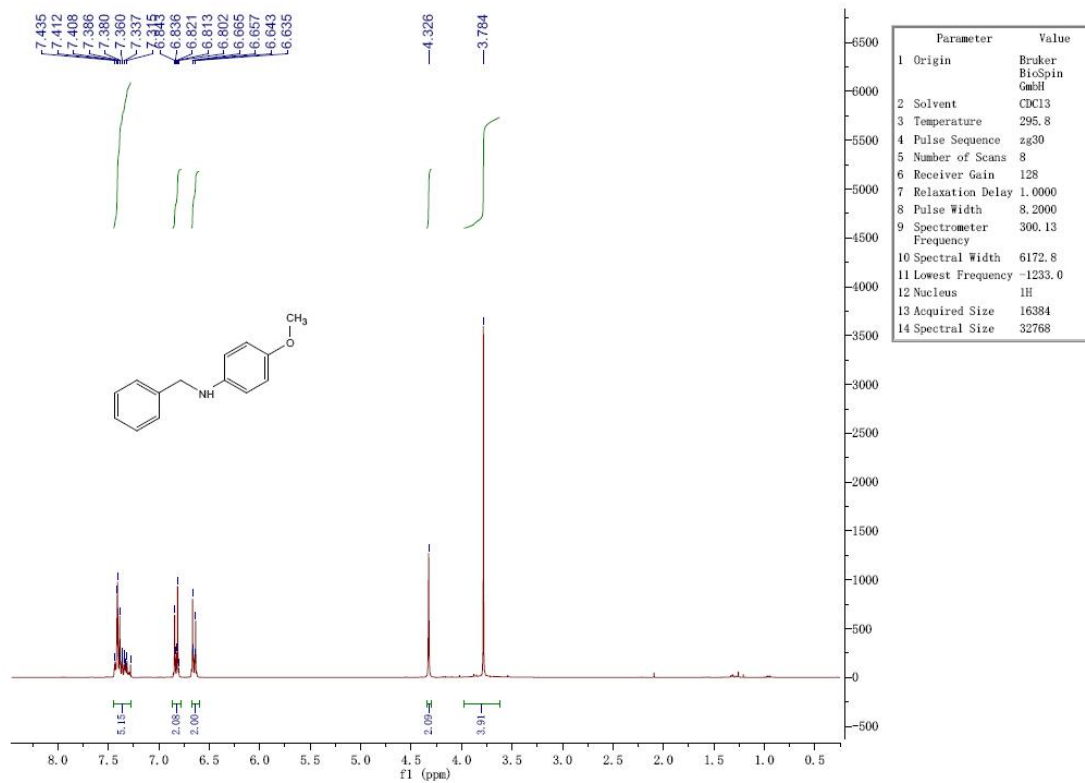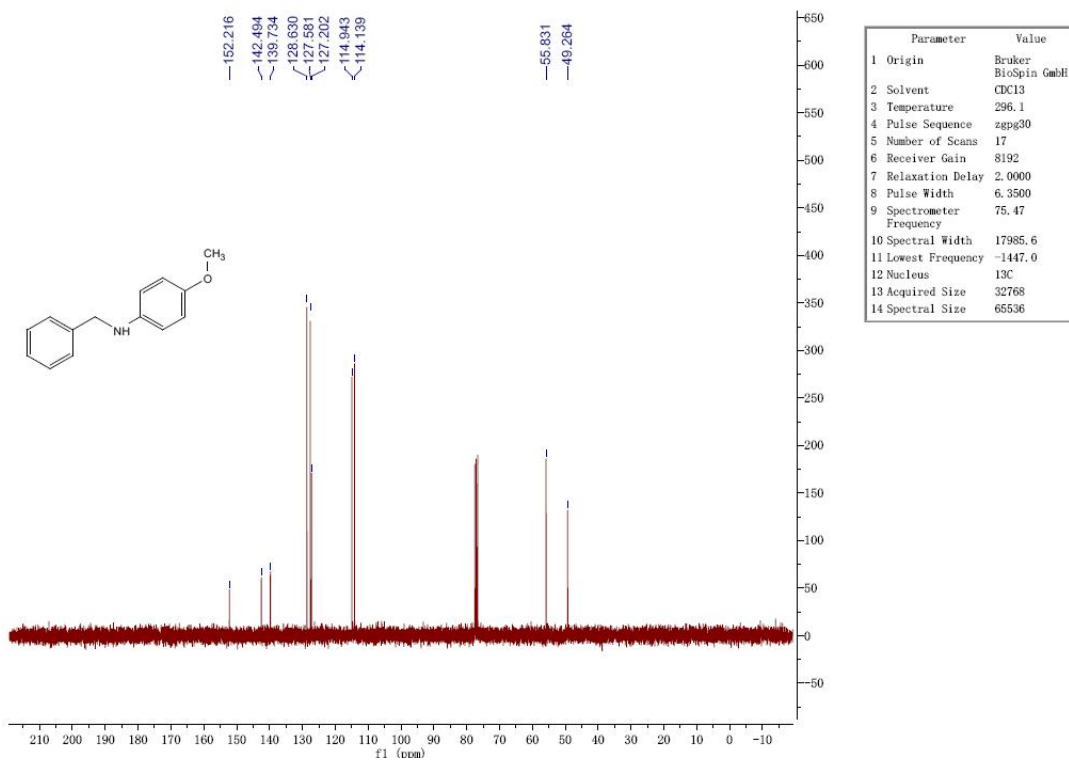

### 4-methoxy-N-(4-methylbenzyl)aniline (4j)

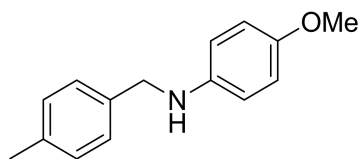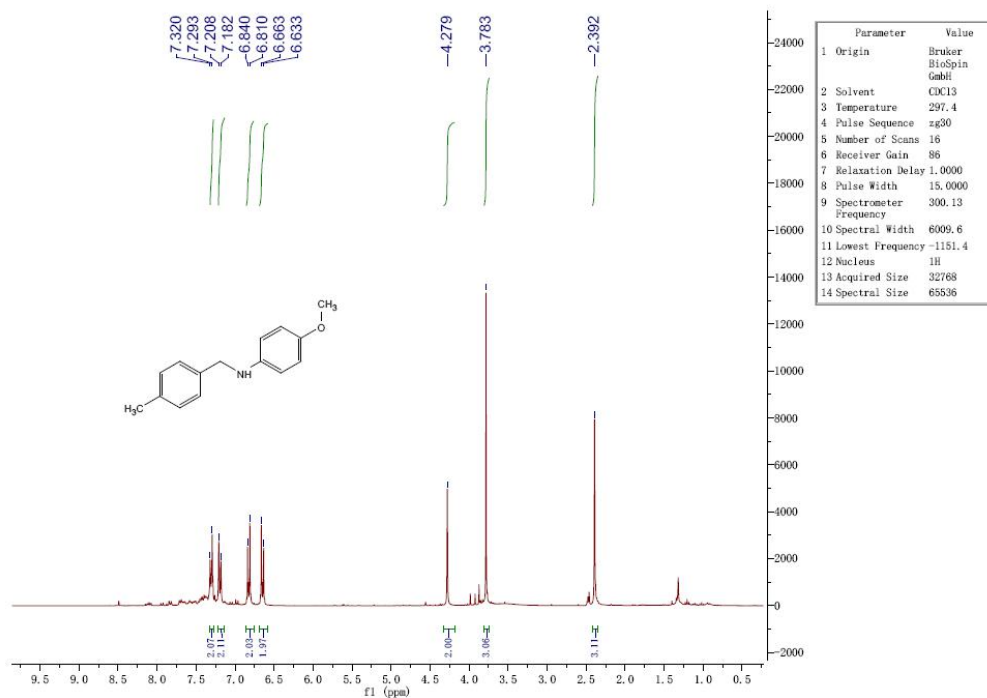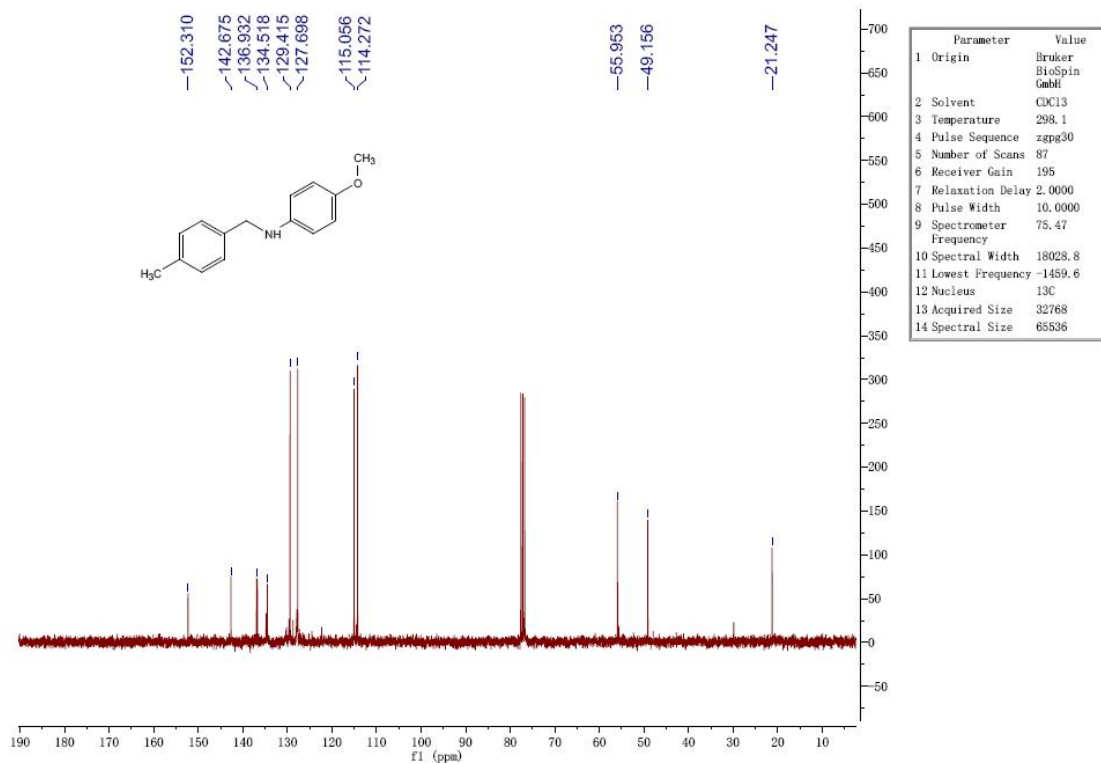

### 4-Bromo-N-(4-methylbenzyl)aniline (4l)

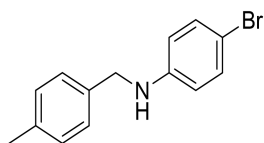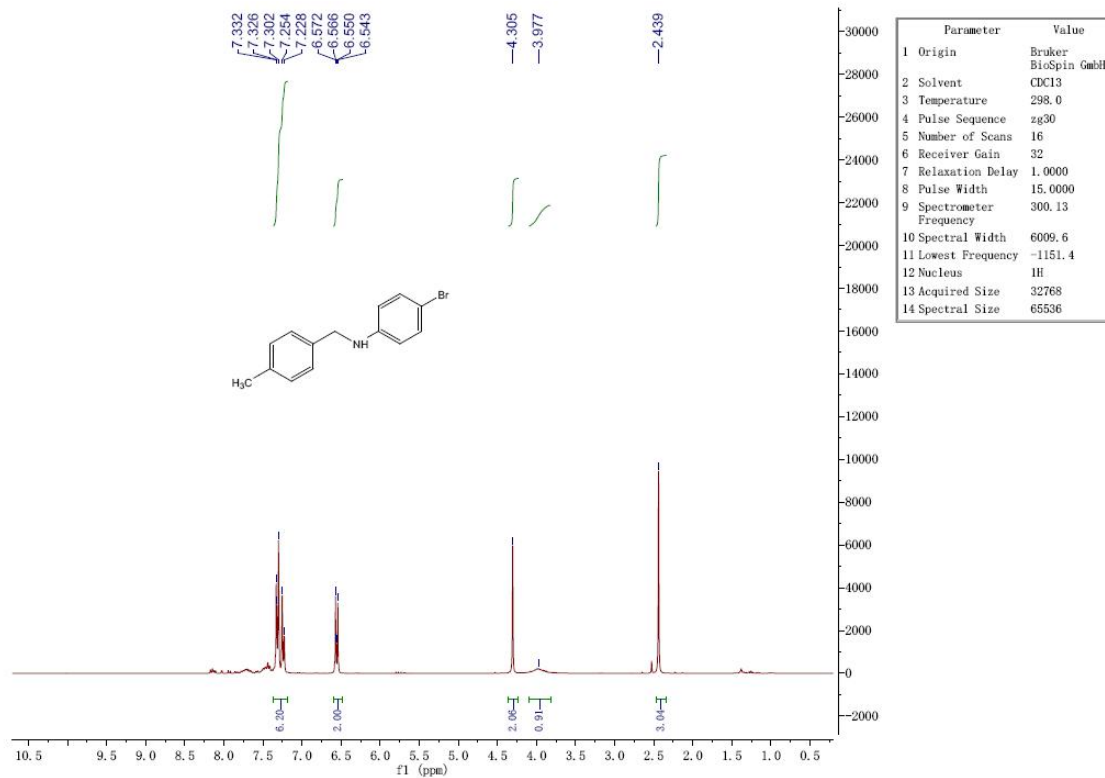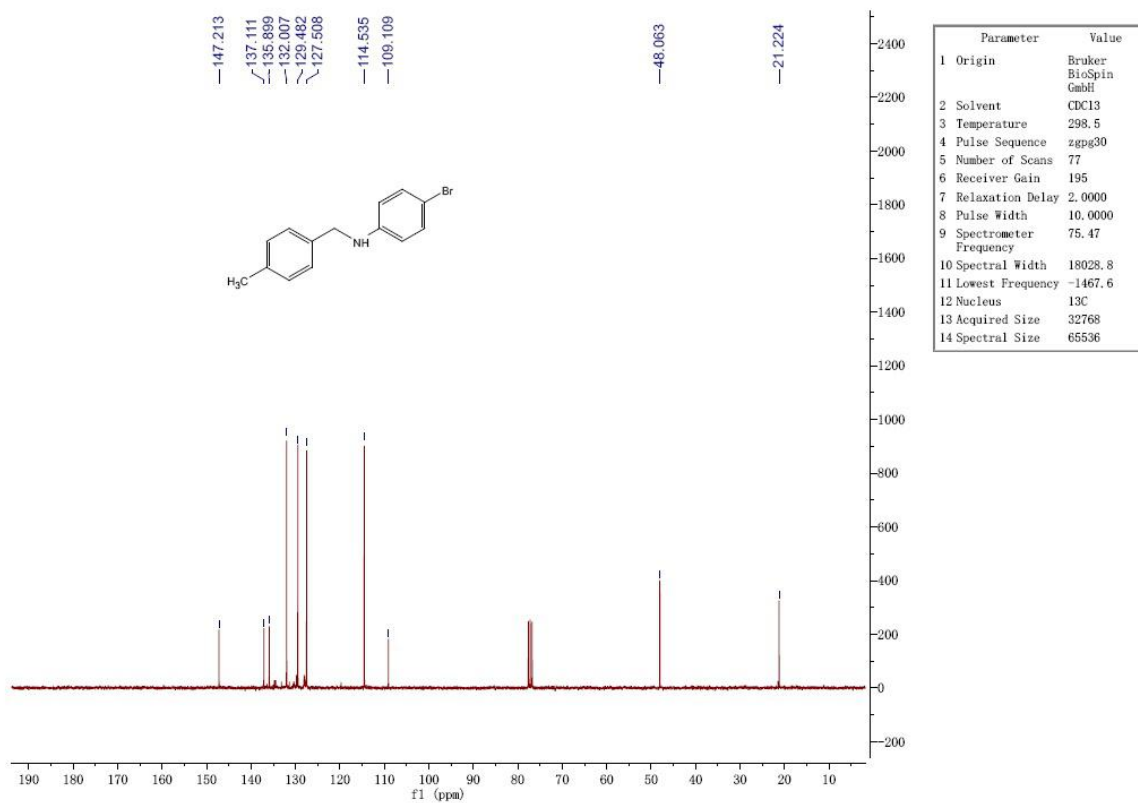

# N-benzyl-2-methylaniline (4m)

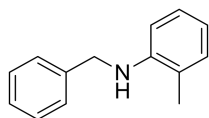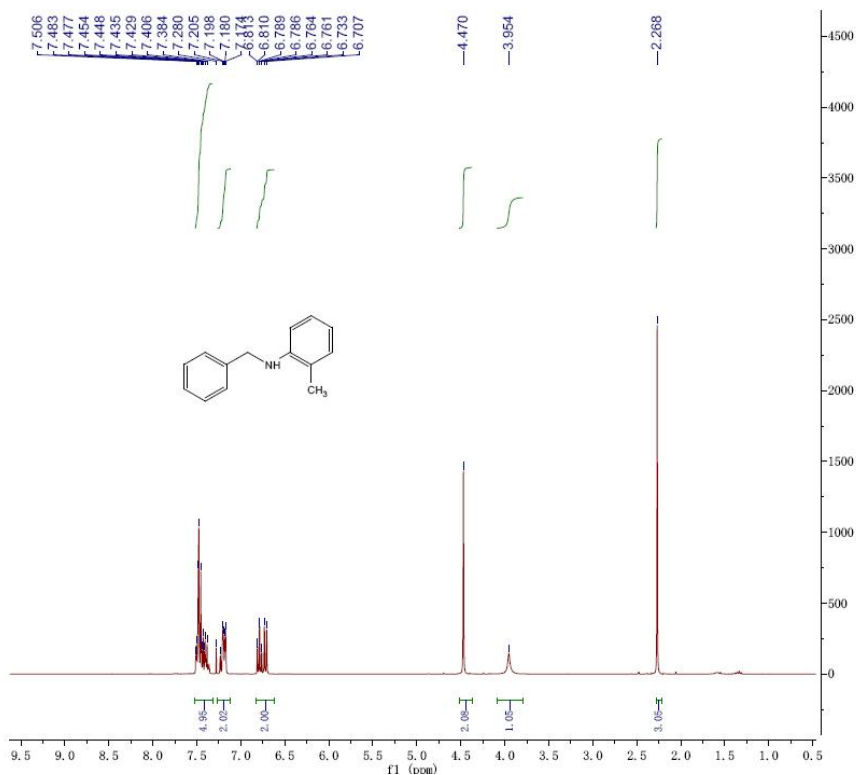

| Parameter                | Value               |
|--------------------------|---------------------|
| 1 Origin                 | Bruker BioSpin GmbH |
| 2 Solvent                | CDCl3               |
| 3 Temperature            | 295.3               |
| 4 Pulse Sequence         | zg30                |
| 5 Number of Scans        | 8                   |
| 6 Receiver Gain          | 90                  |
| 7 Relaxation Delay       | 1.0000              |
| 8 Pulse Width            | 8.2000              |
| 9 Spectrometer Frequency | 300.13              |
| 10 Spectral Width        | 6172.8              |
| 11 Lowest Frequency      | -1233.0             |
| 12 Nucleus               | <sup>1</sup> H      |
| 13 Acquired Size         | 16384               |
| 14 Spectral Size         | 32768               |

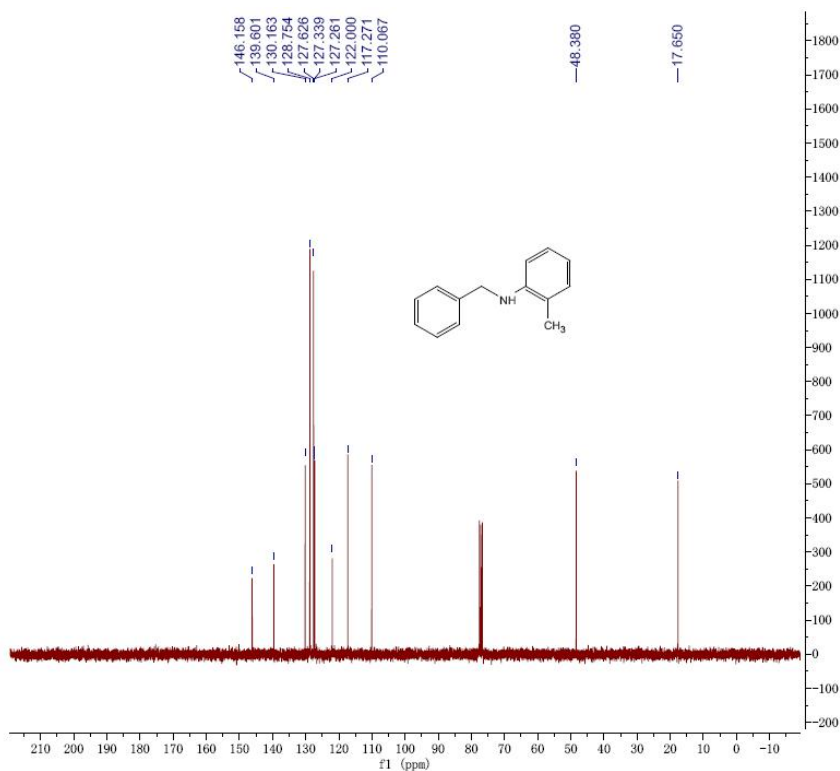

| Parameter                | Value               |
|--------------------------|---------------------|
| 1 Origin                 | Bruker BioSpin GmbH |
| 2 Solvent                | CDCl3               |
| 3 Temperature            | 295.5               |
| 4 Pulse Sequence         | zgpg30              |
| 5 Number of Scans        | 20                  |
| 6 Receiver Gain          | 16384               |
| 7 Relaxation Delay       | 2.0000              |
| 8 Pulse Width            | 6.3500              |
| 9 Spectrometer Frequency | 75.47               |
| 10 Spectral Width        | 17985.6             |
| 11 Lowest Frequency      | -1447.0             |
| 12 Nucleus               | <sup>13</sup> C     |
| 13 Acquired Size         | 32768               |
| 14 Spectral Size         | 65536               |

# N-(Cyclohexylmethyl)-4-methylaniline (4n)

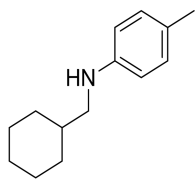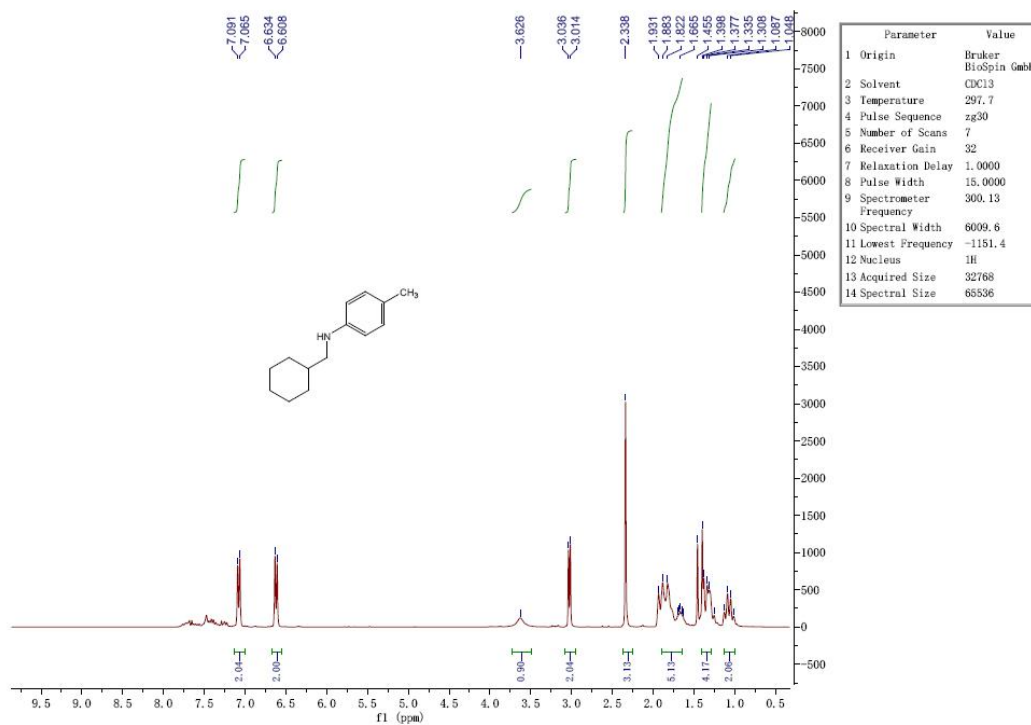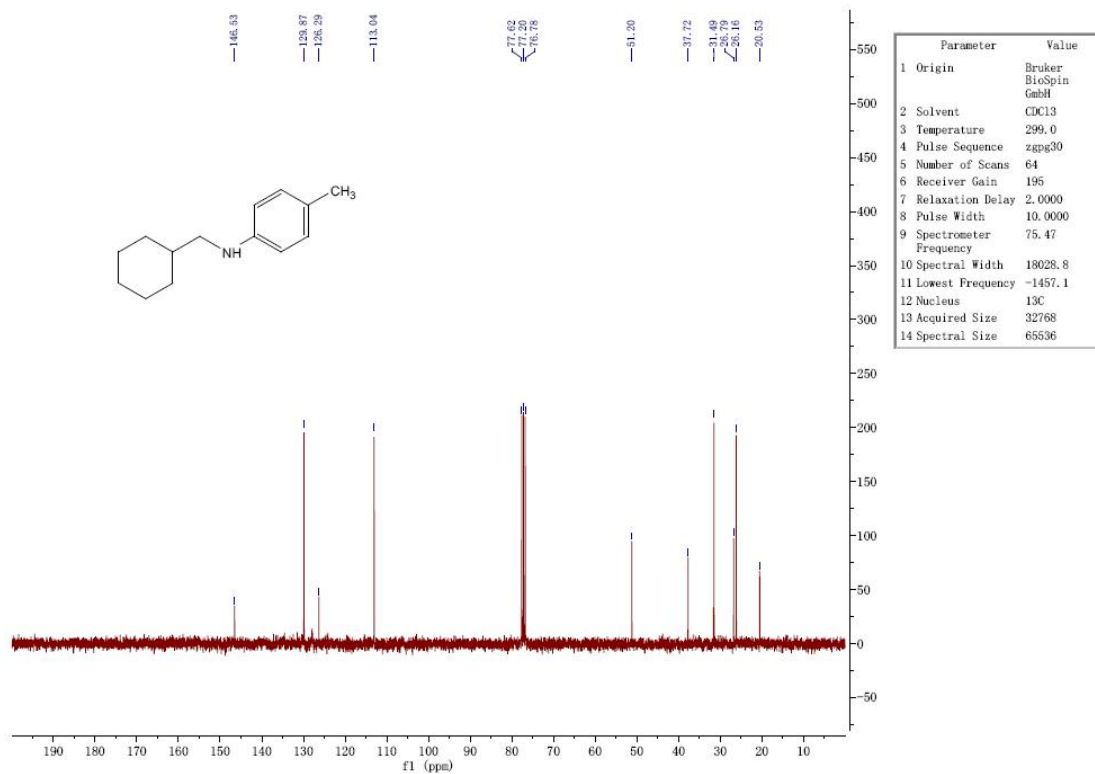

# N-(4-Methyl)-4-methylaniline (4o)

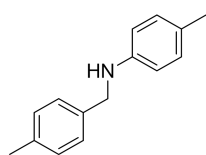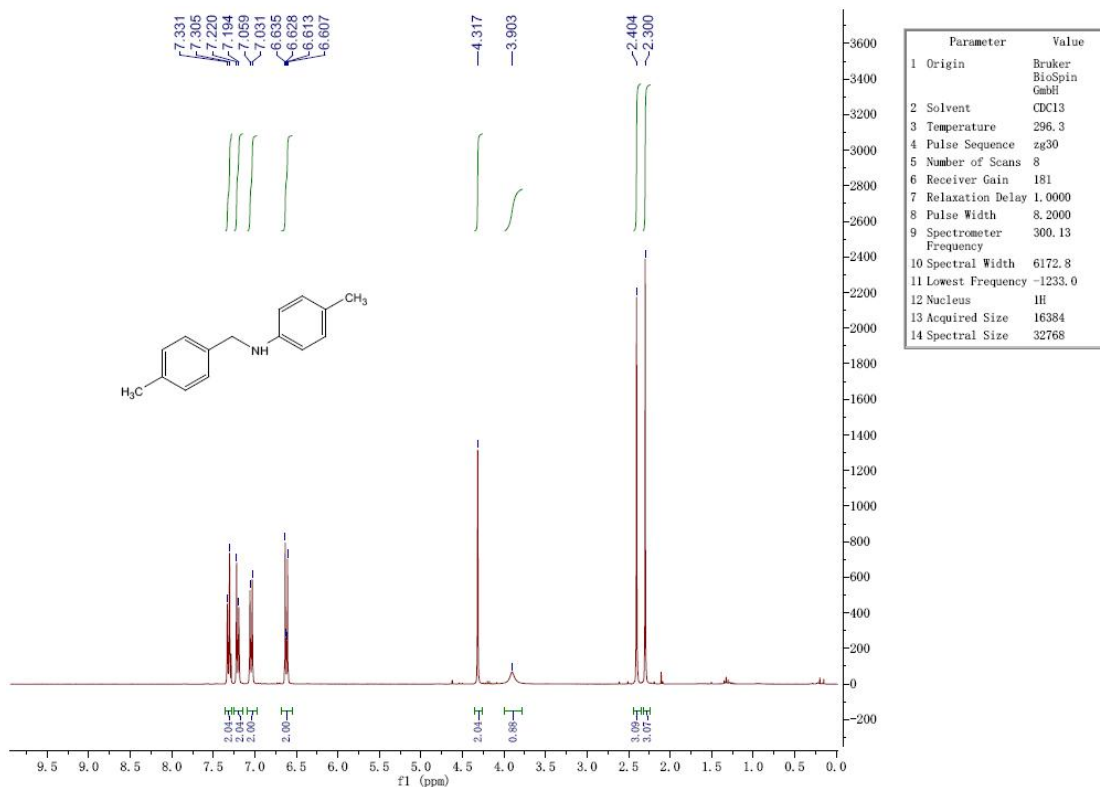

| Parameter           | Value               |
|---------------------|---------------------|
| 1 Origin            | Bruker BioSpin GmbH |
| 2 Solvent           | CDCl3               |
| 3 Temperature       | 296.3               |
| 4 Pulse Sequence    | zg30                |
| 5 Number of Scans   | 8                   |
| 6 Receiver Gain     | 181                 |
| 7 Relaxation Delay  | 1.0000              |
| 8 Pulse Width       | 8.2000              |
| 9 Spectrometer      | 300.13              |
| 10 Spectral Width   | 6172.8              |
| 11 Lowest Frequency | -1233.0             |
| 12 Nucleus          | 1H                  |
| 13 Acquired Size    | 16384               |
| 14 Spectral Size    | 32768               |

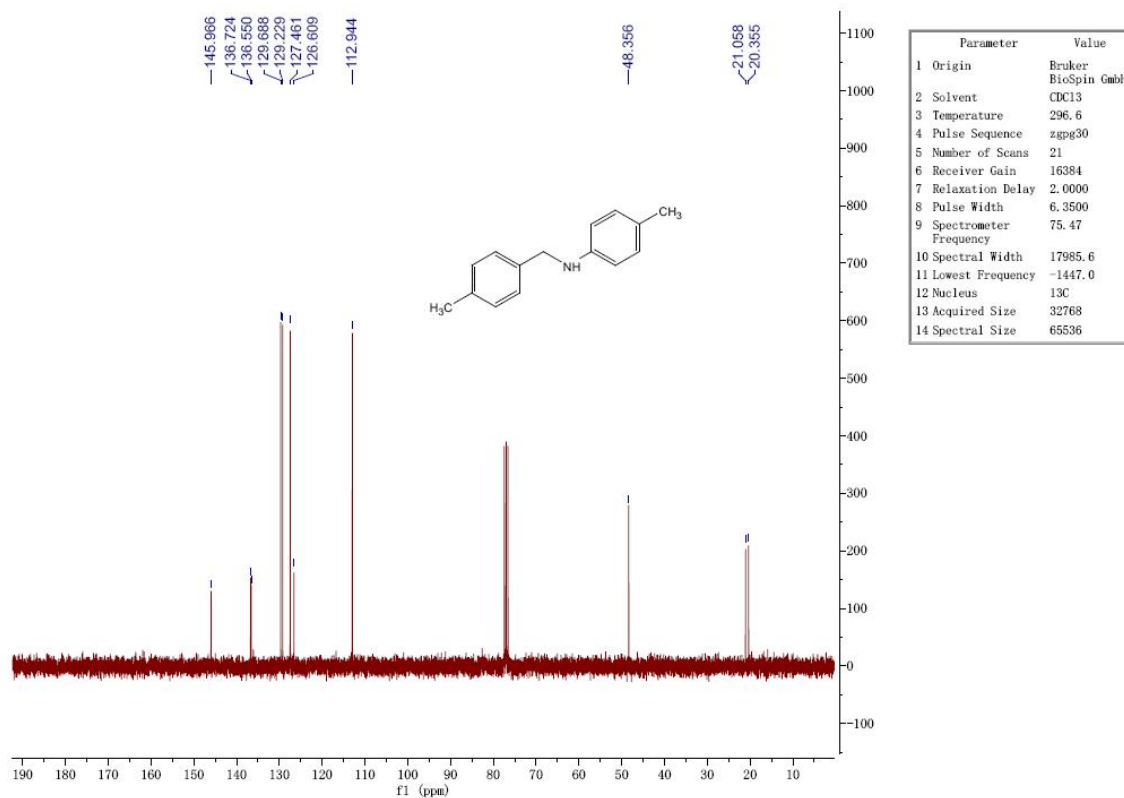

| Parameter           | Value               |
|---------------------|---------------------|
| 1 Origin            | Bruker BioSpin GmbH |
| 2 Solvent           | CDCl3               |
| 3 Temperature       | 296.6               |
| 4 Pulse Sequence    | zgpg30              |
| 5 Number of Scans   | 21                  |
| 6 Receiver Gain     | 16384               |
| 7 Relaxation Delay  | 2.0000              |
| 8 Pulse Width       | 6.3500              |
| 9 Spectrometer      | 75.47               |
| 10 Spectral Width   | 17985.6             |
| 11 Lowest Frequency | -1447.0             |
| 12 Nucleus          | 13C                 |
| 13 Acquired Size    | 32768               |
| 14 Spectral Size    | 65536               |

### N-(4-Bromobenzyl)-4-methylaniline (4p)

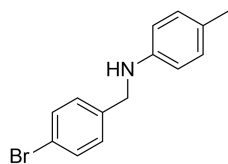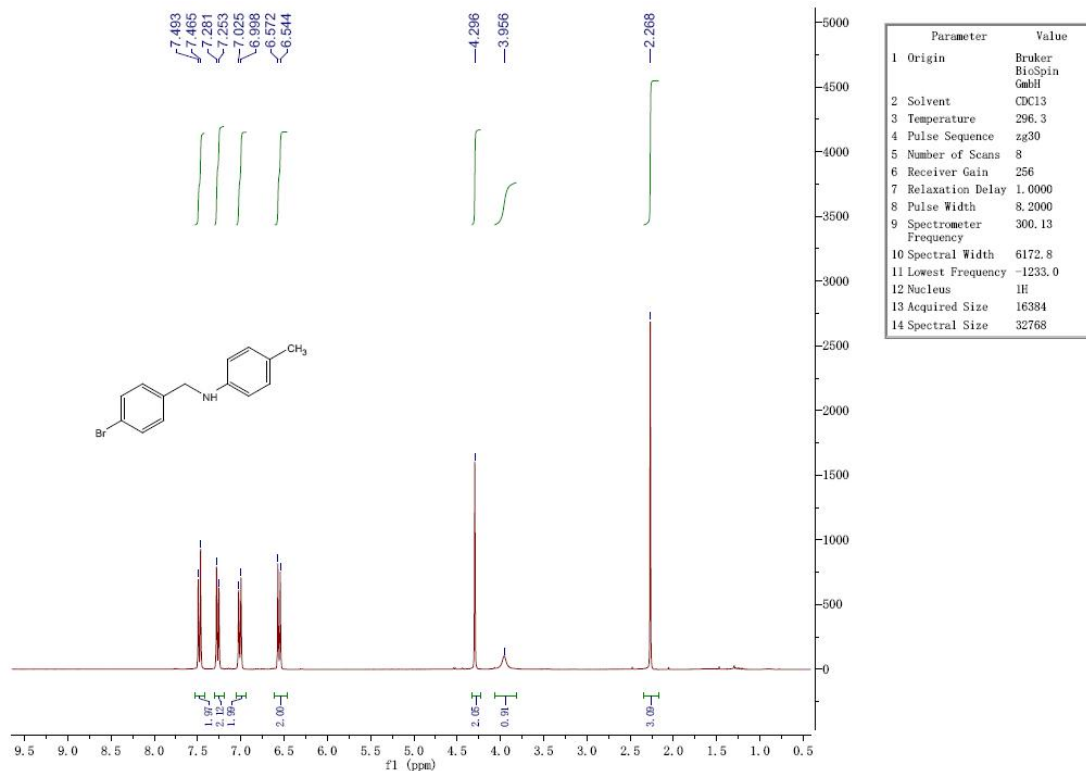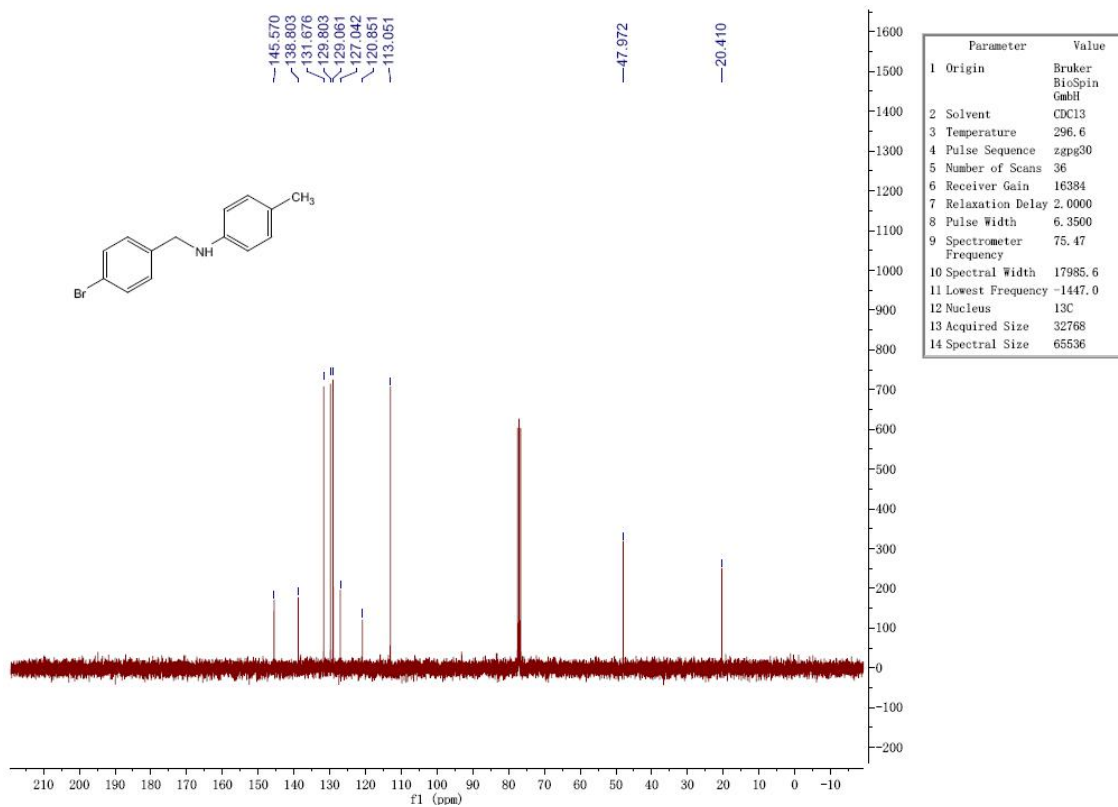

# N-Benzyl-4-chloroaniline (4q)

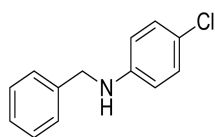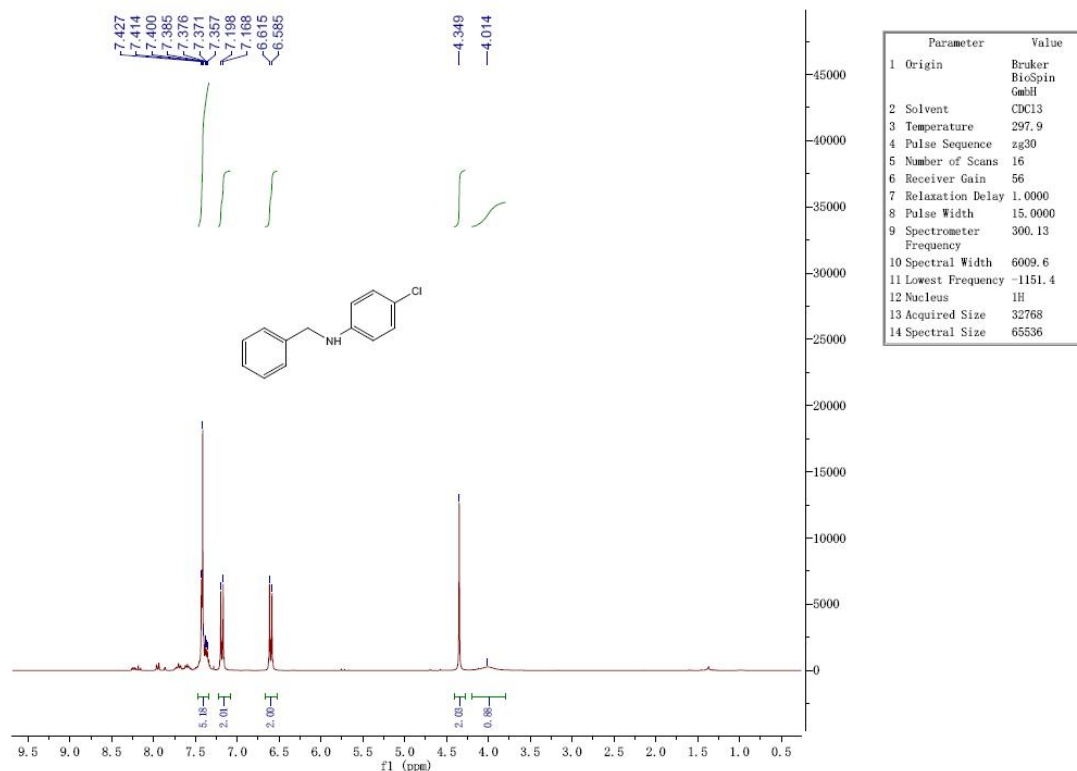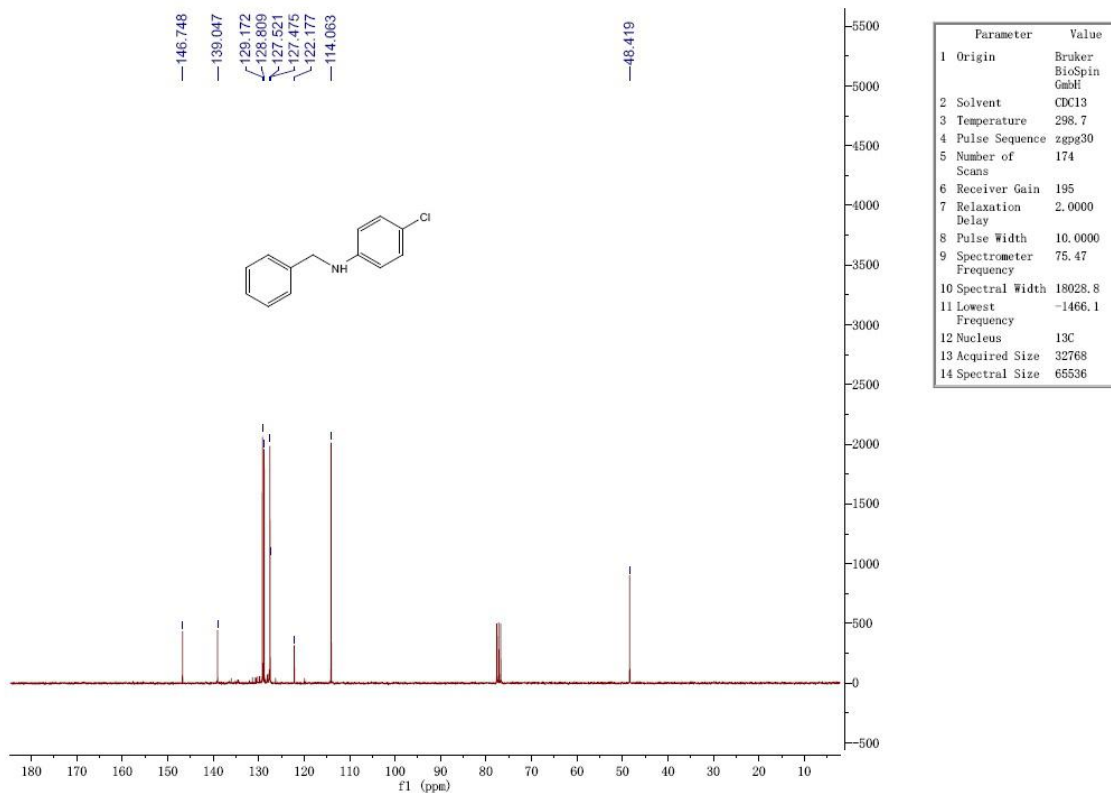



## 2-Fluoro-N-benzylaniline (4r)

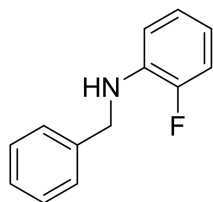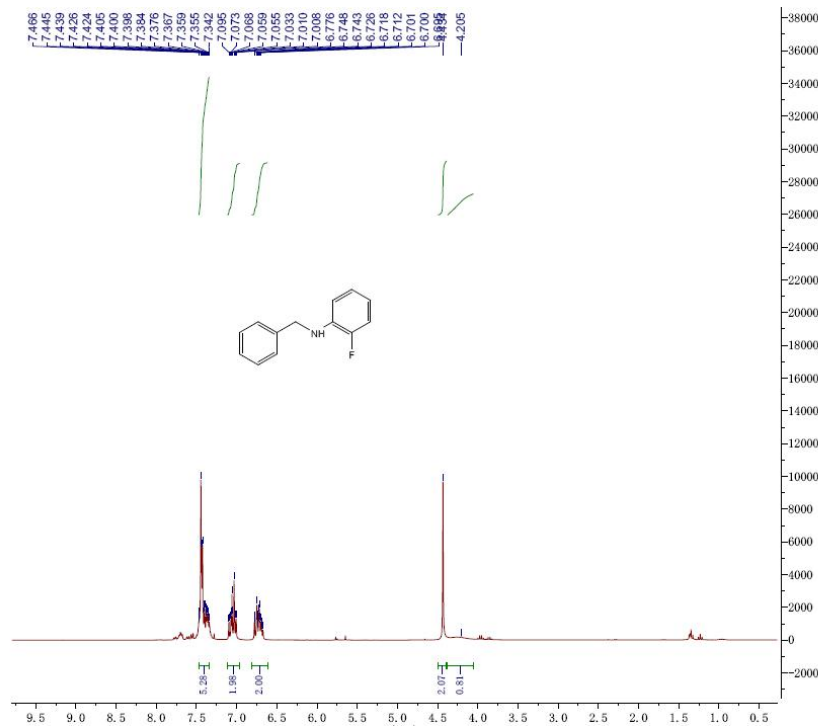

| Parameter                | Value               |
|--------------------------|---------------------|
| 1 Origin                 | Bruker BioSpin GmbH |
| 2 Solvent                | CDCl <sub>3</sub>   |
| 3 Temperature            | 297.7               |
| 4 Pulse Sequence         | zg30                |
| 5 Number of Scans        | 16                  |
| 6 Receiver Gain          | 77                  |
| 7 Relaxation Delay       | 1.0000              |
| 8 Pulse Width            | 15.0000             |
| 9 Spectrometer Frequency | 300.13              |
| 10 Spectral Width        | 6009.6              |
| 11 Lowest Frequency      | -1151.4             |
| 12 Nucleus               | <sup>1</sup> H      |
| 13 Acquired Size         | 32768               |
| 14 Spectral Size         | 65536               |

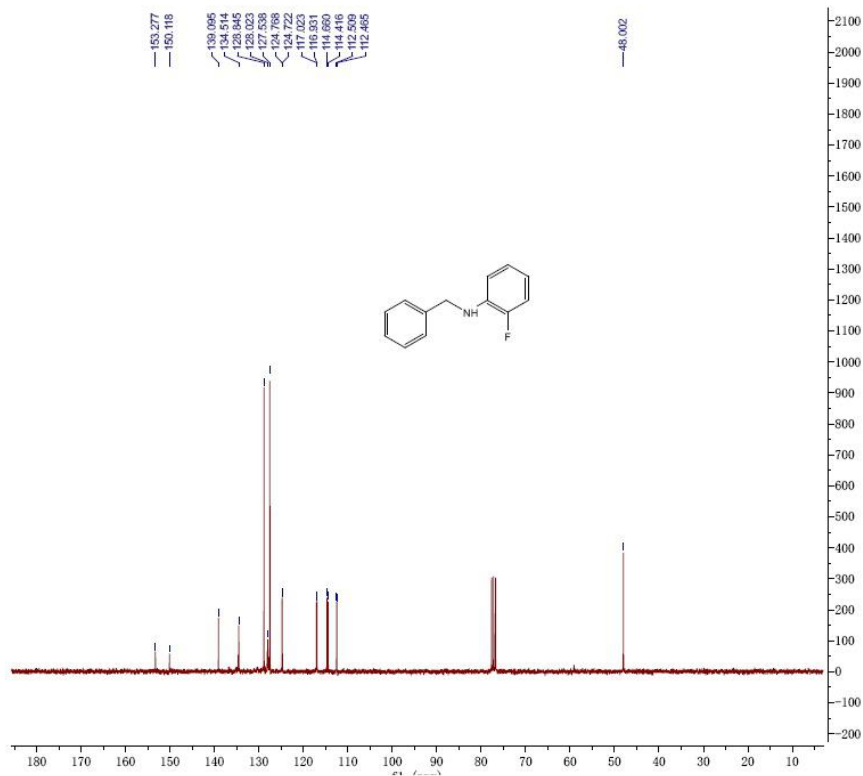

| Parameter                | Value               |
|--------------------------|---------------------|
| 1 Origin                 | Bruker BioSpin GmbH |
| 2 Solvent                | CDCl <sub>3</sub>   |
| 3 Temperature            | 298.4               |
| 4 Pulse Sequence         | zgpg30              |
| 5 Number of Scans        | 122                 |
| 6 Receiver Gain          | 195                 |
| 7 Relaxation Delay       | 2.0000              |
| 8 Pulse Width            | 10.0000             |
| 9 Spectrometer Frequency | 75.48               |
| 10 Spectral Width        | 18028.8             |
| 11 Lowest Frequency      | -1460.2             |
| 12 Nucleus               | <sup>13</sup> C     |
| 13 Acquired Size         | 32768               |
| 14 Spectral Size         | 65536               |

# N-neopentylaniline (4s)

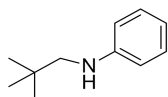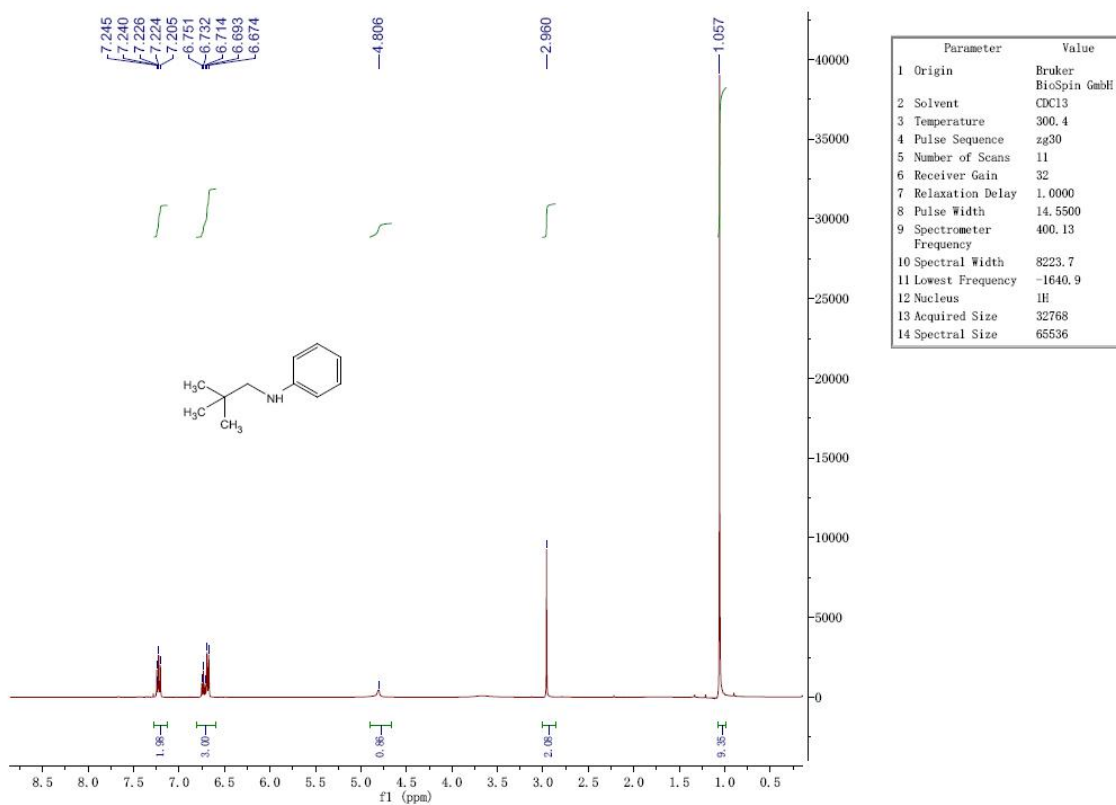

| Parameter                | Value               |
|--------------------------|---------------------|
| 1 Origin                 | Bruker BioSpin GmbH |
| 2 Solvent                | CDCl <sub>3</sub>   |
| 3 Temperature            | 300.4               |
| 4 Pulse Sequence         | zg30                |
| 5 Number of Scans        | 11                  |
| 6 Receiver Gain          | 32                  |
| 7 Relaxation Delay       | 1.0000              |
| 8 Pulse Width            | 14.5500             |
| 9 Spectrometer Frequency | 400.13              |
| 10 Spectral Width        | 8223.7              |
| 11 Lowest Frequency      | -1640.9             |
| 12 Nucleus               | <sup>1</sup> H      |
| 13 Acquired Size         | 32768               |
| 14 Spectral Size         | 65536               |

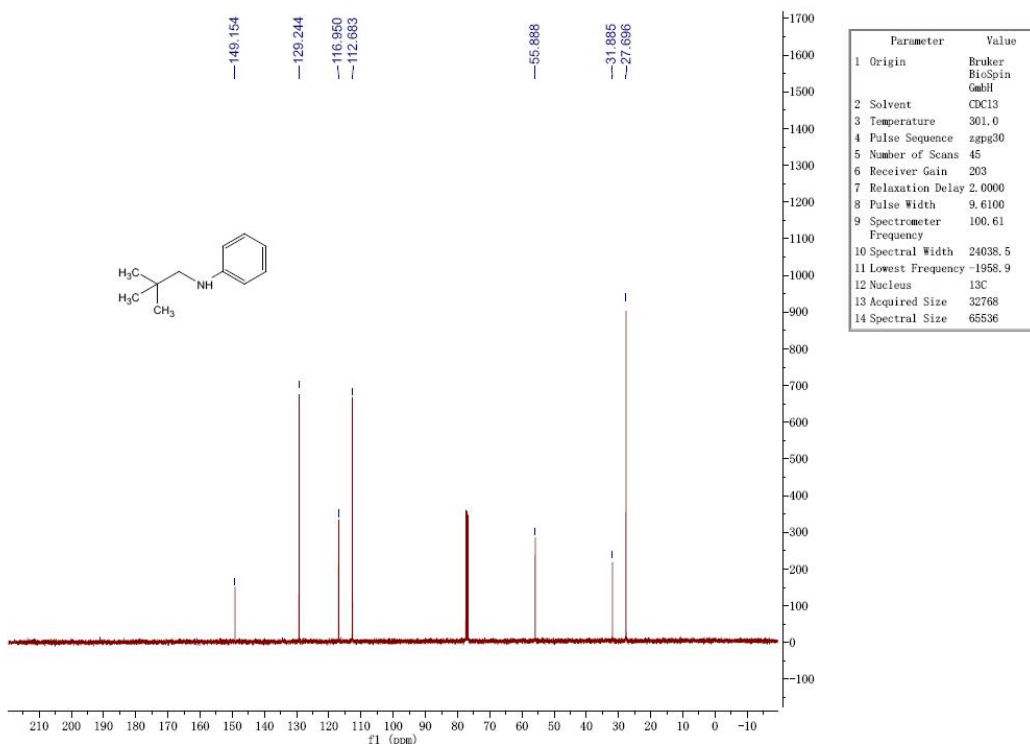

| Parameter                | Value               |
|--------------------------|---------------------|
| 1 Origin                 | Bruker BioSpin GmbH |
| 2 Solvent                | CDCl <sub>3</sub>   |
| 3 Temperature            | 301.0               |
| 4 Pulse Sequence         | zgpg30              |
| 5 Number of Scans        | 45                  |
| 6 Receiver Gain          | 203                 |
| 7 Relaxation Delay       | 2.0000              |
| 8 Pulse Width            | 9.6100              |
| 9 Spectrometer Frequency | 100.61              |
| 10 Spectral Width        | 24038.5             |
| 11 Lowest Frequency      | -1958.9             |
| 12 Nucleus               | <sup>13</sup> C     |
| 13 Acquired Size         | 32768               |
| 14 Spectral Size         | 65536               |

# Dibenzylamine (4t)

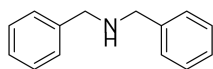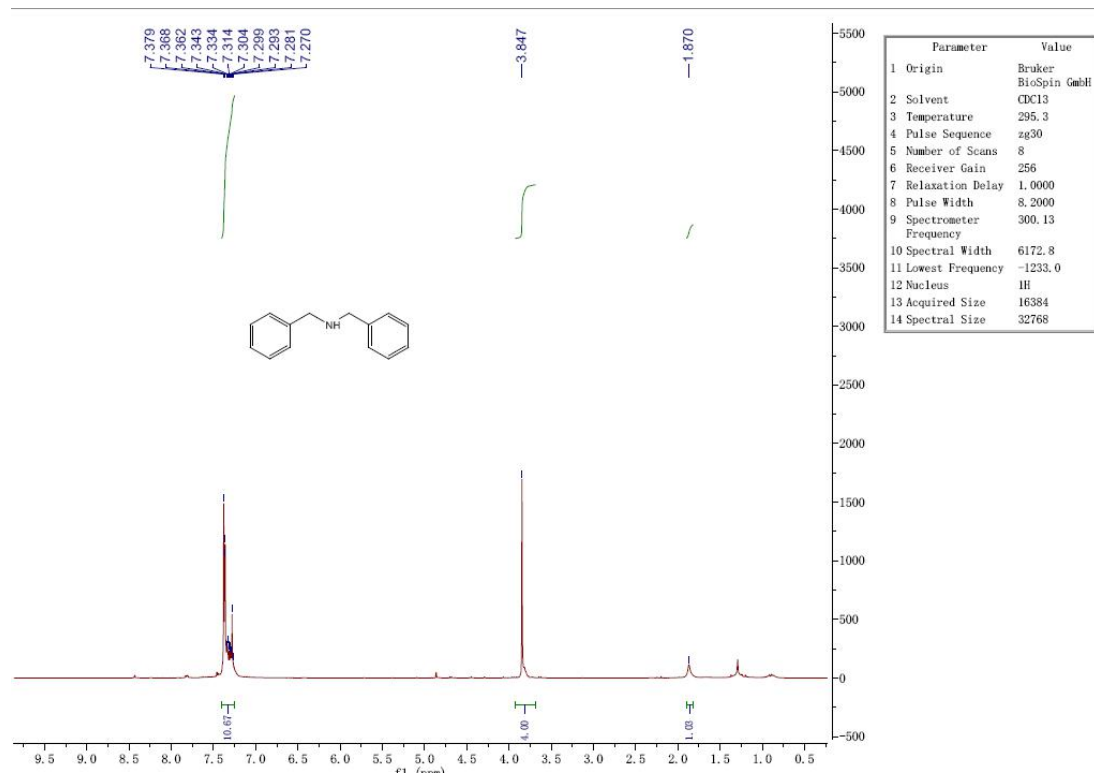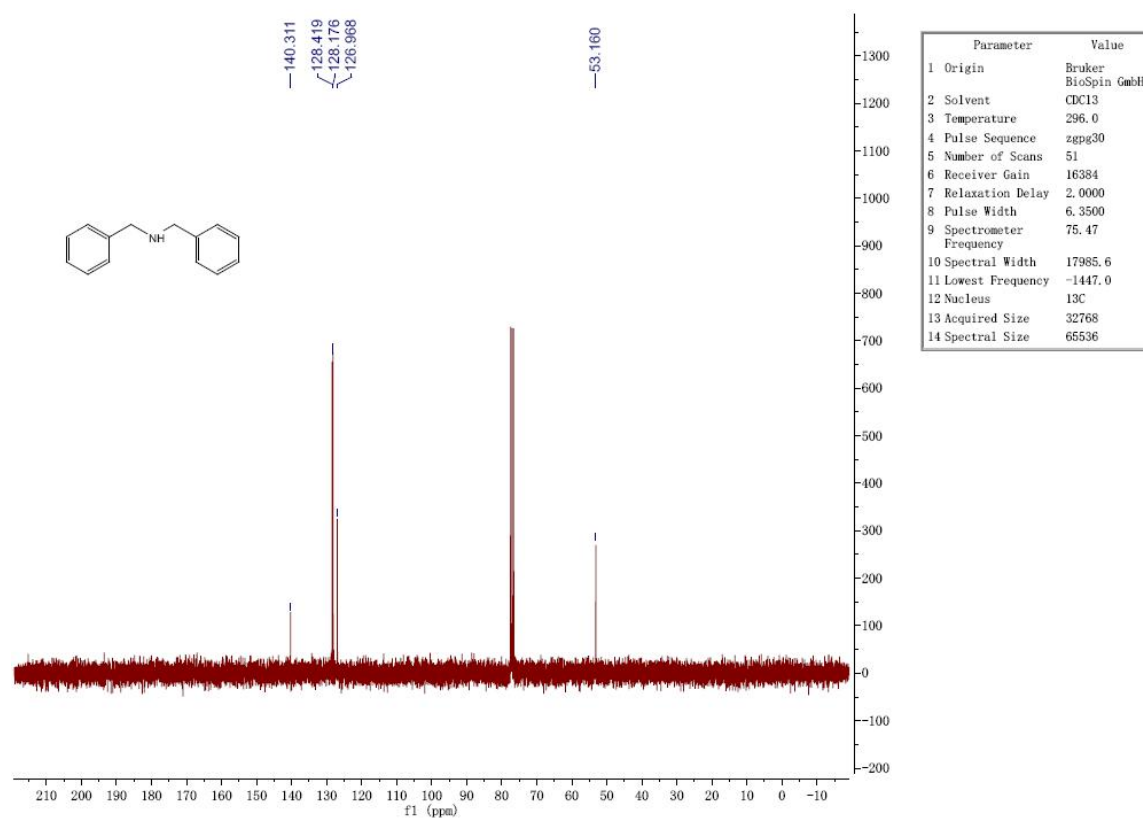

Supplement: c7ra04245k1.pdf [file c7ra04245k1.pdf]
